# Human self-initiated action is preceded by a reliable process of noise reduction

Short title: Neural precursors of self-initiated action

Nima Khalighinejad<sup>1</sup>, Aaron Schurger<sup>2</sup>, Andrea Desantis<sup>1</sup>, Leor Zmigrod<sup>3</sup>, Patrick Haggard<sup>1\*</sup>

<sup>1</sup> Institute of Cognitive Neuroscience, University College London, London WC1N 3AR, UK

<sup>2</sup> Cognitive Neuroimaging Unit, CEA DRF/I2BM, INSERM, Université Paris-Sud, Université Paris-Saclay, NeuroSpin center, 91191 Gif/Yvette, France

<sup>3</sup> Department of Psychology, University of Cambridge, Cambridge CB2 3EB, UK

\* Correspondence should be addressed to Patrick Haggard, Institute of Cognitive Neuroscience, University College London, Alexandra House, 17 Queen Square, London WC1N 3AR, UK. Tel: +44 (0)20 7679 1149, E-mail: [p.haggard@ucl.ac.uk](mailto:p.haggard@ucl.ac.uk)

NK is currently at Department of Experimental Psychology, University of Oxford, Oxford, UK

AD is currently at Laboratoire Psychologie de la Perception, Université Paris Descartes & CNRS (UMR 8242), Paris, France

## **Abstract**

A gradual buildup of electrical potential over motor areas precedes self-initiated movements. These “readiness potentials” (RPs) could simply reflect stochastic fluctuations in neural activity. We operationalised self-initiated actions as endogenous ‘skip’ responses while waiting for target stimuli in a perceptual decision task. Across-trial variability of EEG decreased more markedly prior to self-initiated compared to externally-triggered skip actions. This convergence towards a fixed pattern suggests a consistent preparatory process prior to self-initiated action. A leaky stochastic accumulator model could reproduce these features of the data, given the additional assumption of a decrease in noise level at the input to the accumulator prior to self-initiated, but not externally-triggered actions. The assumed reduction in neural noise was supported by analyses of both within-trial EEG variability and of spectral power. We suggest that a process of noise reduction is consistently recruited prior to self-initiated action. This precursor event may underlie the emergence of RP.

**Keywords:** self-initiated action; externally-triggered action; readiness potential; stochastic fluctuations; human

## 1 **Introduction**

2 Functional and neuroanatomical evidence has been used to distinguish between two broad  
3 classes of human actions: self-initiated actions that happen endogenously, in the absence of  
4 any specific stimulus (Haggard, 2008; Passingham, Bengtsson, & Lau, 2010), and reactions  
5 to external cues. Endogenous actions are distinctive in several ways. First, they depend on  
6 an internal decision to act and are not triggered by external stimuli. In other words, the agent  
7 decides internally what to do, or when to do it, without any external cue specifying the action  
8 (Passingham et al., 2010). Second, we often deliberate and consider reasons before  
9 choosing and performing one course of action rather than an alternative. Thus, endogenous  
10 actions should be responsive to reasons (Anscombe, 2000). These features of endogenous  
11 action capture many key attributes of human volition. While there has been extensive  
12 research on action selection and initiation in response to external cues, the brain  
13 mechanisms for endogenous, self-initiated actions have been less studied.

14 Many studies of human voluntary action involve the paradoxical instruction to ‘act *freely*’ e.g.,  
15 “press a key when you feel the urge to do so” (Cunnington, Windischberger, Deecke, &  
16 Moser, 2002; Jahanshahi et al., 1995; Libet, Gleason, Wright, & Pearl, 1983; Wiese et al.,  
17 2004). However, the situation and task demands of such experiments are complex, and  
18 have been justly criticised (Nachev & Hacker, 2014). We adapted for humans a paradigm  
19 previously used in animal research (Murakami, Vicente, Costa, & Mainen, 2014), which  
20 embeds endogenous actions within the broader framework of reward-guided perceptual  
21 decision-making. Participants responded to the direction of unpredictably-occurring dot  
22 motion stimuli by pressing left or right arrow keys (Gold & Shadlen, 2007). Importantly, they  
23 could also choose to skip waiting for the stimuli to appear, by pressing both keys  
24 simultaneously whenever they wished. The skip response thus reflects a purely endogenous  
25 decision to act, without any direct external stimulus, and provides an operational definition of  
26 a self-initiated action. Self-initiated ‘skip’ responses were compared to a block where

27 participants made the same bilateral 'skip' actions in response to an unpredictable change in  
28 the fixation point (Figure. 1).

29 Controversies regarding precursor processes have been central to neuroscientific debates  
30 about volition (Dennett, 2015; Libet et al., 1983). The classical neural marker of precursor  
31 processes for endogenous action is the readiness potential (RP: Kornhuber & Deecke,  
32 1965). The RP is taken to be "the electro-physiological sign of planning, preparation, and  
33 initiation of volitional acts" (Kornhuber & Deecke, 1990) and was considered a pre-requisite  
34 of the conscious intention to act (Libet et al., 1983; Sinnott-Armstrong & Nadel, 2010).

35 Classical studies explicitly or implicitly assume that the RP reflects a putative 'internal  
36 volitional signal', with a constant, characteristic ramp-like form, necessarily preceding action  
37 initiation - although this signal is heavily masked by noise in any individual trial (Dirnberger,  
38 Lang, & Lindinger, 2008). However, the very idea that the RP reflects a specific precursor  
39 process leading to endogenous action has been recently challenged. Alternative models  
40 suggest that the rising ramp pattern of the mean RP does not reflect a goal-directed process  
41 but rather reflects subthreshold stochastic fluctuations that influence the precise time of  
42 crossing the threshold for movement (Murakami et al., 2014; Schurger, Sitt, & Dehaene,  
43 2012). Crucially, averaging these random fluctuations time-locked to action initiation results  
44 in the rising ramp pattern of the mean RP, with its appearance of a stable ERP component.  
45 According to the stochastic account, the RP reflects cross-trial averaging of data epochs  
46 time locked to crests in autocorrelated neural noise, rather than a specific, goal-directed  
47 process that causes action. This view, which can be formally expressed in a quantitative  
48 model, and tested against neural data (Murakami et al., 2014; Schurger et al., 2012), has  
49 radically revised neuroscientific theories of voluntary action.

50 Both classical and stochastic models can reproduce the existence of mean RP, treating it as  
51 signal or as averaged noise, respectively. However, the two models make different  
52 predictions about EEG variability prior to action. On the stochastic model, neural activity  
53 eventually and necessarily converges because stochastic fluctuations must always approach

54 the motor threshold from below. The time of convergence depends only on the temporal  
55 autocorrelation of the EEG signal. On the classical model, the distribution of single trial RPs  
56 *additionally* converges because the RP marks a consistent precursor process that reliably  
57 precedes self-initiated action. While variability of RP activity has rarely been studied  
58 previously (but see Dirnberger et al., 2008), several studies of externally-triggered  
59 processing have used variability of neural responses to identify neural codes. For example,  
60 variability goes down in the interval between a go cue and movement onset (Churchland,  
61 Yu, Ryu, Santhanam, & Shenoy, 2006), and during perceptual processing (He, 2013;  
62 Schurger, Sarigiannidis, Naccache, Sitt, & Dehaene, 2015). We thus hypothesised that  
63 variability of neural activity should decrease more markedly prior to self-initiated skip actions.  
64 The *additional* decrease in variability would be a marker of a consistent preparatory process,  
65 or precursor for self-initiated action.

66 We found an additional drop in inter-trial variability beginning 1.5 s before self-initiated skips,  
67 compared to externally-driven skip actions. This differential convergence suggests a  
68 consistent precursor process that reliably precedes self-initiated action. The gradual onset of  
69 differential convergence suggests that the precursor process has a variable duration, rather  
70 than a fixed duration (Dirnberger et al., 2008), although we could not formally compare these  
71 alternative models using our methods. We showed that a modified version of an established  
72 computational model based on stochastic fluctuations on neural activity (Schurger et al.,  
73 2012; Usher & McClelland, 2001) could capture the patterns of EEG variability found in our  
74 data. Crucially, the model required a specific modification to explain the data, namely a  
75 neurocognitive process of noise reduction, time-locked to the moment of action. Our model  
76 further predicts that decreases in within-trial EEG fluctuation and spectral power should be  
77 observed prior to self-initiated action. These predictions were confirmed. Importantly, these  
78 differences between conditions began well before the stimulus onset in our externally-  
79 triggered condition (Figures 2 & 7), so presumably reflects changes in ongoing EEG prior to

80 self-initiated action. Thus, impending self-initiated voluntary action appears to be associated  
81 with a distinctive, time-specific stabilisation of premovement EEG patterns.

## 82 **Results**

### 83 *Behavioural data.*

84 Participants (n=22) waited for a display of random dots to move coherently (step change  
85 from 0% to 100% coherence) towards the left or right. They responded with the left or right  
86 hand by pressing a left or right arrow key on a keyboard, accordingly. They received a  
87 reward for correct responses. However, the time of movement onset was drawn  
88 unpredictably from an exponential distribution, so waiting was sometimes extremely long. In  
89 the '*self-initiated*' condition blocks (Figure 1A), participants could skip waiting if they chose  
90 to, by pressing the left and right response keys simultaneously. The skip response saved  
91 time, but produced a smaller reward than a response to dot motion. The experiment was  
92 limited to one hour, so using the skip response implied a general understanding of the trade-  
93 off between time and money. A skip response thus reflects a purely endogenous decision to  
94 act, in the absence of any external instruction to act, and based on the tradeoff between  
95 later, larger, and smaller, earlier rewards. This provides an operational definition of volition  
96 within our experimental design, which captures some of the important features of  
97 endogenous voluntary control, as well as the linkage of self-initiated action to other aspects  
98 of cognition, such as decision-making and judgement (Schüür & Haggard, 2011). In the  
99 '*externally-triggered*' condition blocks, participants could not choose for themselves when to  
100 skip. Instead, they were instructed to make skip responses by an external signal (Figure 1B)  
101 (see materials and methods).

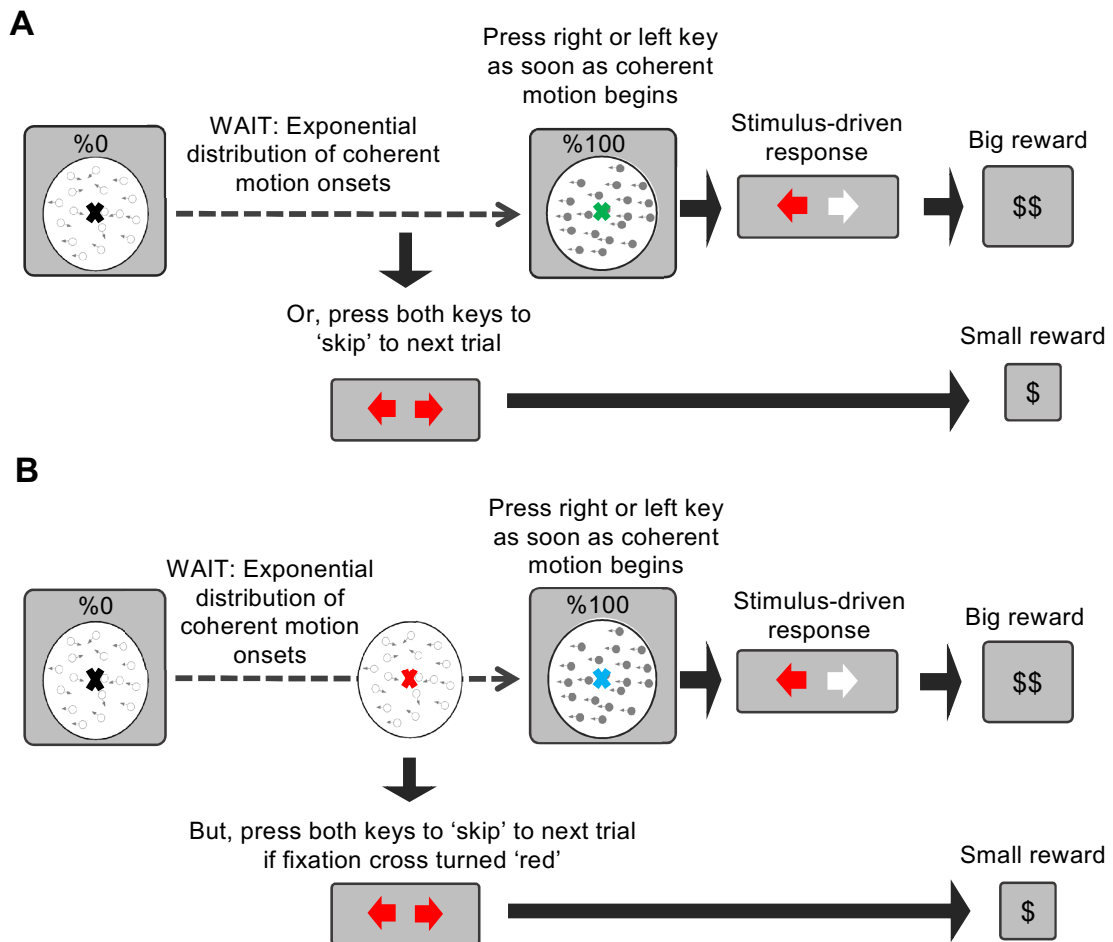

102 ✖ Fixation cross changes colour during the trial 

103 Figure 1. Timeline of an experimental trial. Participants responded to the direction of dot-motion with  
104 left and right keypresses. Dot-motion could begin unpredictably, after a delay drawn from an  
105 exponential distribution. A. In the 'self-initiated' blocks participants waited for an unpredictably  
106 occurring dot-motion stimulus, and were rewarded for correct left-right responses to motion  
107 direction. They could decide to skip long waits for the motion stimulus, by making a bilateral  
108 keypress. They thus decided between waiting, which lost time but brought a large reward, and  
109 'skipping', which saved time but brought smaller rewards. The colour of the fixation cross changed  
110 continuously during the trial, but was irrelevant to the decision task. B. In the 'externally-triggered'  
111 blocks, participants were instructed to make bilateral skip keypresses when the fixation cross became  
112 red, and not otherwise.

113

114 On average participants skipped 108 (SD = 16) and 106 (SD = 17) times in the self-initiated  
115 and externally-triggered conditions, respectively. They responded to coherent dot motion in



116 the remaining trials ( $N = 177$ ,  $SD = 61$ ), with a reaction time of 767 ms ( $SD = 111$  ms).  
117 Those responses were correct on 86% ( $SD = 4\%$ ) of trials. The average waiting time before  
118 skipping in the self-initiated condition (7.3 s,  $SD = 1.6$ ) was similar to that in the externally-  
119 triggered condition (7.6 s,  $SD = 1.6$ ), confirming the success of our yoking procedure (see  
120 materials and methods). The waiting time varied more across trials within each individual,  
121 than across individuals, suggesting that self-initiated skip responses represented an on-line  
122 decision to act, rather than a pre-decided stereotyped response. Thus, the  $SD$  across trials  
123 had a mean of 3.17 s ( $SD$  across participants = 1.42 s) for self-initiated skips. Our yoking  
124 procedure ensured similar values for externally-triggered skips (mean of  $SD$  across trials  
125 3.15 s,  $SD = 1.43$  s). In the externally-triggered condition, the average reaction time to the  
126 fixation cross change was 699 ms ( $SD = 67$  ms). On average participants earned £2.14 ( $SD$   
127 = £0.33) from skipping and £2.78 ( $SD = £0.99$ ) from correctly responding to dot motion  
128 stimuli. This reward supplemented a fixed fee for participation. The mean and distribution of  
129 waiting time before skip action of each participant are presented in Table S1 and Figure S1.

130 *EEG variability decreases disproportionately prior to action in self-initiated and externally-*  
131 *triggered conditions.*

132 EEG data were pre-processed and averaged separately for self-initiated and externally-  
133 triggered conditions. Figure 2A shows the grand average RP amplitude in both conditions.  
134 The mean RP for self-initiated actions showed the familiar negative-going ramp. Note that  
135 our choice to baseline-correct at the time of the action itself (see materials and methods)  
136 means that the RP never in fact reaches negative voltage values. This negative-going  
137 potential is absent from externally-triggered skip actions (Jahanshahi et al., 1995; Papa,  
138 Artieda, & Obeso, 1991). The morphology of the mean RP might simply reflect the average  
139 of stochastic fluctuations, rather than a goal-directed build-up. However, these theories offer  
140 differing interpretations of the variability of individual EEG trajectories across trials (see  
141 intro).

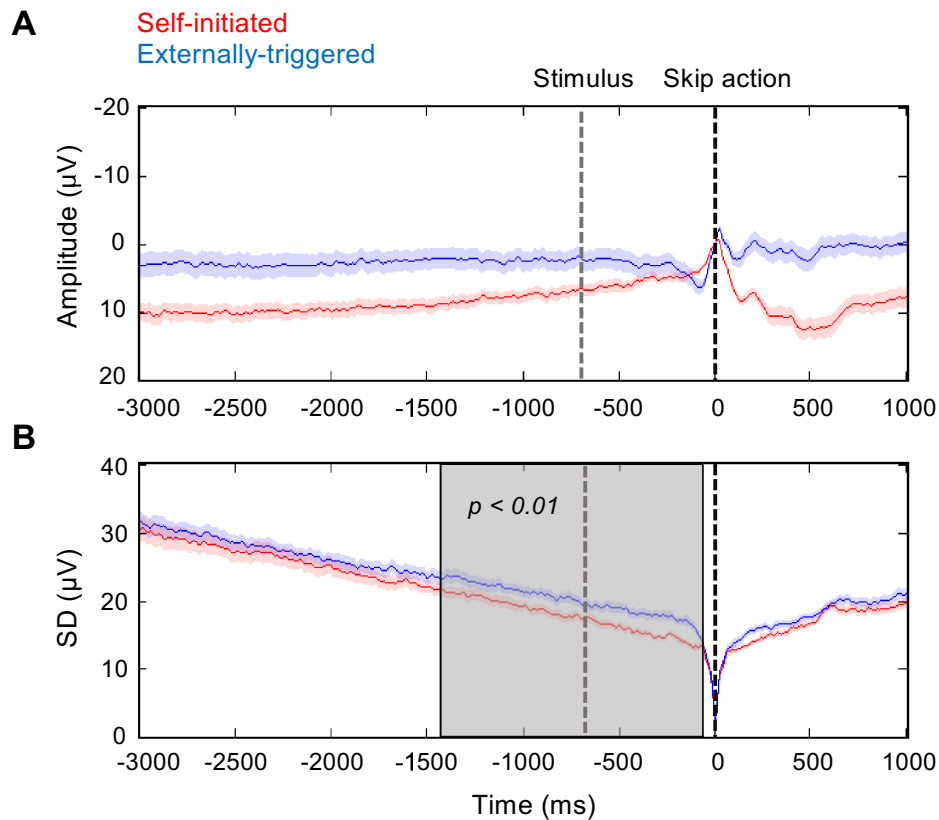

142

143 Figure 2. EEG activity prior to skip actions. The red and blue lines represent self-initiated and  
144 externally-triggered skip conditions, respectively. Data is time-locked to the skip action (black vertical  
145 line), baseline-corrected in a 10 ms window around the skip, and recorded from FCz electrode. The  
146 average time of the skip instruction (fixation cross changing to red) in the externally-triggered  
147 condition is shown as a grey vertical line. A. Grand average RP amplitude  $\pm$  standard error of the  
148 mean across participants (SEM). B. Standard deviation across trials averaged across participants  $\pm$   
149 SEM. Shaded grey area shows a significant difference between standard deviation traces across  
150 central electrodes, detected by cluster-based permutation test.

151 To investigate this distribution we computed standard deviation of individual trial EEG, and  
152 found a marked decrease prior to self-initiated skip action. This decrease is partly an artefact  
153 of the analysis technique: individual EEG epochs were time-locked and baseline-corrected at  
154 action onset, making the across-trial standard deviation at the time of action necessarily zero  
155 (but see Figure S2). However, this pre-movement drop in EEG standard deviation was more  
156 marked for self-initiated than for externally-triggered skip actions, although the analysis  
157 techniques were identical. Paired-samples t-test on jack-knifed data showed that this  
158 difference in SD was significant in the last three of the four pre-movement time bins before

159 skip actions (see materials and methods): that is from -1.5 to -1 s ( $t(21) = 4.32$ ,  $p < 0.01$ ,  $d_z$   
160 = 0.92,  $p$  values are Bonferroni corrected for four comparisons), -1 to -0.5 s ( $t(21) = 5.97$ ,  $p <$   
161 0.01,  $d_z = 1.27$ ), and -0.5 to 0 s ( $t(21) = 5.39$ ,  $p < 0.01$ ,  $d_z = 1.15$ ).

162 To mitigate any effects of arbitrary selection of electrodes or time-bins, we also performed  
163 cluster-based permutation tests (see materials and methods). For the comparison between  
164 SDs prior to self-initiated vs externally-triggered skip actions, a significant cluster ( $p < 0.01$ )  
165 was identified extending from 1488 to 80 ms premovement (Figure 2B, see also Figure S2  
166 for a different baseline). This suggests that neural activity gradually converges towards an  
167 increasingly reliable pattern prior to self-initiated actions. Importantly, this effect is not  
168 specific to FCz but could be observed over a wide cluster above central electrodes (Figure  
169 S3). However, the bilateral skip response used here makes the dataset suboptimal for  
170 thoroughly exploring the fine spatial topography of these potentials, which we hope to  
171 address in future research.

172 It has been shown that stimulus anticipation is preceded by a cortical negative wave, the  
173 contingent negative variation (CNV) (Walter, Cooper, Aldridge, McCallum, & Winter, 1964).  
174 The CNV has been associated with expectation and temporal processing (Casini & Vidal,  
175 2011; Van Rijn, Kononowicz, Meck, Ng, & Penney, 2011). Hence, our measures in the self-  
176 initiated condition could reflect both accumulating conditions that make a skip action  
177 desirable (e.g., passage of time without dot motion onset), and the preparation of the skip  
178 action itself. However, our externally-triggered skip condition controls for effects of mere  
179 passage of time, and expectation of dot motion onset.

180 To ensure that the key cognitive factors in the task were balanced between self-initiated and  
181 externally-triggered conditions, we also analysed mean and SD EEG amplitude prior to  
182 stimulus-triggered responses to coherent dot motion (as opposed to skip responses). We did  
183 not observe any negative-going potential prior to coherent dot motion (Figure 3A), again  
184 suggesting that temporal expectation did not strongly contribute to our ERPs. More  
185 importantly, the SD of EEG prior to coherent dot motion onset did not differ between

186 conditions in any time window ( $p > 0.5$ , Bonferroni corrected for four comparisons) (Figure  
187 3B). This suggests that the disproportionate drop in SD prior to skip actions cannot be  
188 explained merely by a difference in expectation of dot stimuli or temporal processing.  
189 Moreover, an explanation based on temporal processing would presumably predict stronger  
190 EEG convergence when participants wait longer before skip action. In fact, we found a  
191 negative correlation between EEG convergence and waiting time (Figure S4).

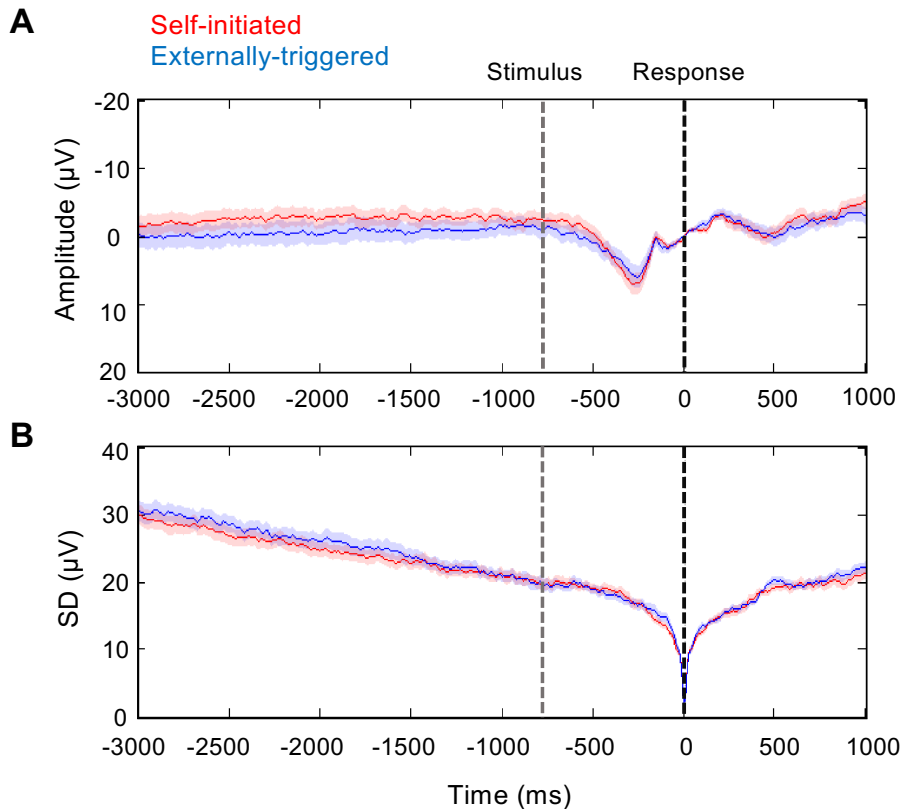

192

193 Figure 3. EEG activity prior to response to coherent dot motion direction. The red and blue lines  
194 represent activity in self-initiated and externally-triggered blocks, respectively. Data is time-locked to  
195 the response to coherent dot motion direction (black vertical line), baseline-corrected in a 10 ms  
196 window around the response, and recorded from FCz electrode. The average time of the coherent dot  
197 motion onset is shown as a grey vertical line. A. Grand average ERPs  $\pm$  SEM across participants. B.  
198 Standard deviation across trials, averaged across participants  $\pm$  SEM across participants.

199

200 Finally, variability in the reaction time to respond to externally-triggered skip cues could  
201 potentially smear out stimulus-driven preparation of skip actions. Such jitter in RT would

202 have the artefactual effect of increasing EEG variability across trials. To rule out this  
203 possibility we checked whether across-trial EEG convergence was correlated across  
204 participants with variability in behavioural reaction time to the skip response cue, but found  
205 no significant correlation between the two variables. This suggests that the difference in  
206 EEG convergence between self-initiated and externally-triggered skip conditions could not  
207 be explained by mere variability in RT to skip cues (Figure S5).

#### 208 *Modelling the converging EEG distribution of self-initiated actions.*

209 Leaky stochastic accumulator models have been used previously to explain the neural  
210 decision of 'when' to move in a self-initiated task (Schurger et al., 2012). A general  
211 imperative to perform the task shifts the premotor activity up closer to threshold and then a  
212 random threshold-crossing event provides the proximate cause of action. Hence, the precise  
213 time of action is driven by accumulated internal physiological noise, and could therefore be  
214 viewed as random, rather than decided (Schurger et al., 2012). However, the across-trial  
215 variability of cortical potentials in our dataset suggests that neural activity converges on a  
216 fixed pattern prior to self-initiated actions, to a greater extent than for externally-triggered  
217 actions. This differential convergence could reflect a between-condition difference in the  
218 autocorrelation function of the EEG. The early and sustained additional reduction in SD  
219 before self-initiated actions motivated us to hypothesise an additional process of noise  
220 control associated with self-initiated actions.

#### 221 *Sensitivity analysis*

222 To investigate this hypothesis we first performed a sensitivity analysis by investigating how  
223 changing key parameters of the model could influence across-trial variability of the output  
224 (*for details see materials and methods*). We modelled the hypothesised process of noise  
225 control by allowing a gradual *change in noise* ( $\Delta c$ ) prior to action. We also explored how  
226 changes in the key *drift* ( $l$ ) and *leak* ( $k$ ) parameters would influence the trial-to-trial variability  
227 of RP. We gradually changed each parameter while holding the others fixed, and simulated

228 RP amplitude in 1000 trials time locked to a threshold-crossing event. SD was then  
229 measured across these simulated trials. Simulated across-trial SDs showed that lower drift  
230 rates and shorter leak constants were associated with a higher across-trial SD. Conversely,  
231 reductions in noise were associated with a lower across-trial SD (Figure 4A-C). Thus, for the  
232 model to reproduce the differential EEG convergence found in our EEG data, either the *drift*  
233 or the *leak* should be higher, or the *change in noise* parameter should be lower, in self-  
234 initiated compared to externally-triggered skip action conditions.

### 235 *Model fitting and optimal parameters*

236 We next fitted the model on the mean RP amplitude of each participant, separately for the  
237 self-initiated and externally triggered conditions (Table S2, S3). The best fitting parameters  
238 were then compared between the two conditions. The *drift* was significantly lower ( $t(21) = -$   
239  $4.47$ ,  $p < 0.001$ , after Bonferroni correction for the three parameters tested) in the self-  
240 initiated (mean across participants = 0.09, SD = 0.03) compared to the externally-triggered  
241 condition (mean across participants = 0.13, SD = 0.04) (Figure 4D). The *leak* was also  
242 significantly lower ( $t(21) = -4.20$ ,  $p < 0.001$ , Bonferroni corrected) in the self-initiated (mean  
243 across participants = 0.40, SD = 0.21) compared to the externally-triggered condition (mean  
244 across participants = 0.58, SD = 0.20) (Figure 4E). The *change in noise* was negative in the  
245 self-initiated (mean across participants = -0.03, SD = 0.05) but positive in the externally-  
246 triggered condition (mean across participants = 0.02, SD = 0.05). This difference was  
247 significant between the conditions ( $t(21) = -5.38$ ,  $p < 0.001$ , Bonferroni corrected) (Figure  
248 4F). Finally, to investigate which parameters were most sensitive to the difference between  
249 self-initiated and externally-triggered conditions, we expressed the effect of condition on  
250 each parameter as an effect size (standardized mean difference, Cohen's  $d_z$ ). Importantly,  
251 the effect size for the between-condition difference in the *change in noise* parameter ( $d_z =$   
252  $1.15$ , 95%CI = [0.60 1.68]) was larger than that for the *drift* ( $d_z = 0.95$ , 95%CI = [0.44 1.45])  
253 or the *leak* ( $d_z = 0.89$ , 95%CI = [0.39 1.38]) parameters (Figure 4G).

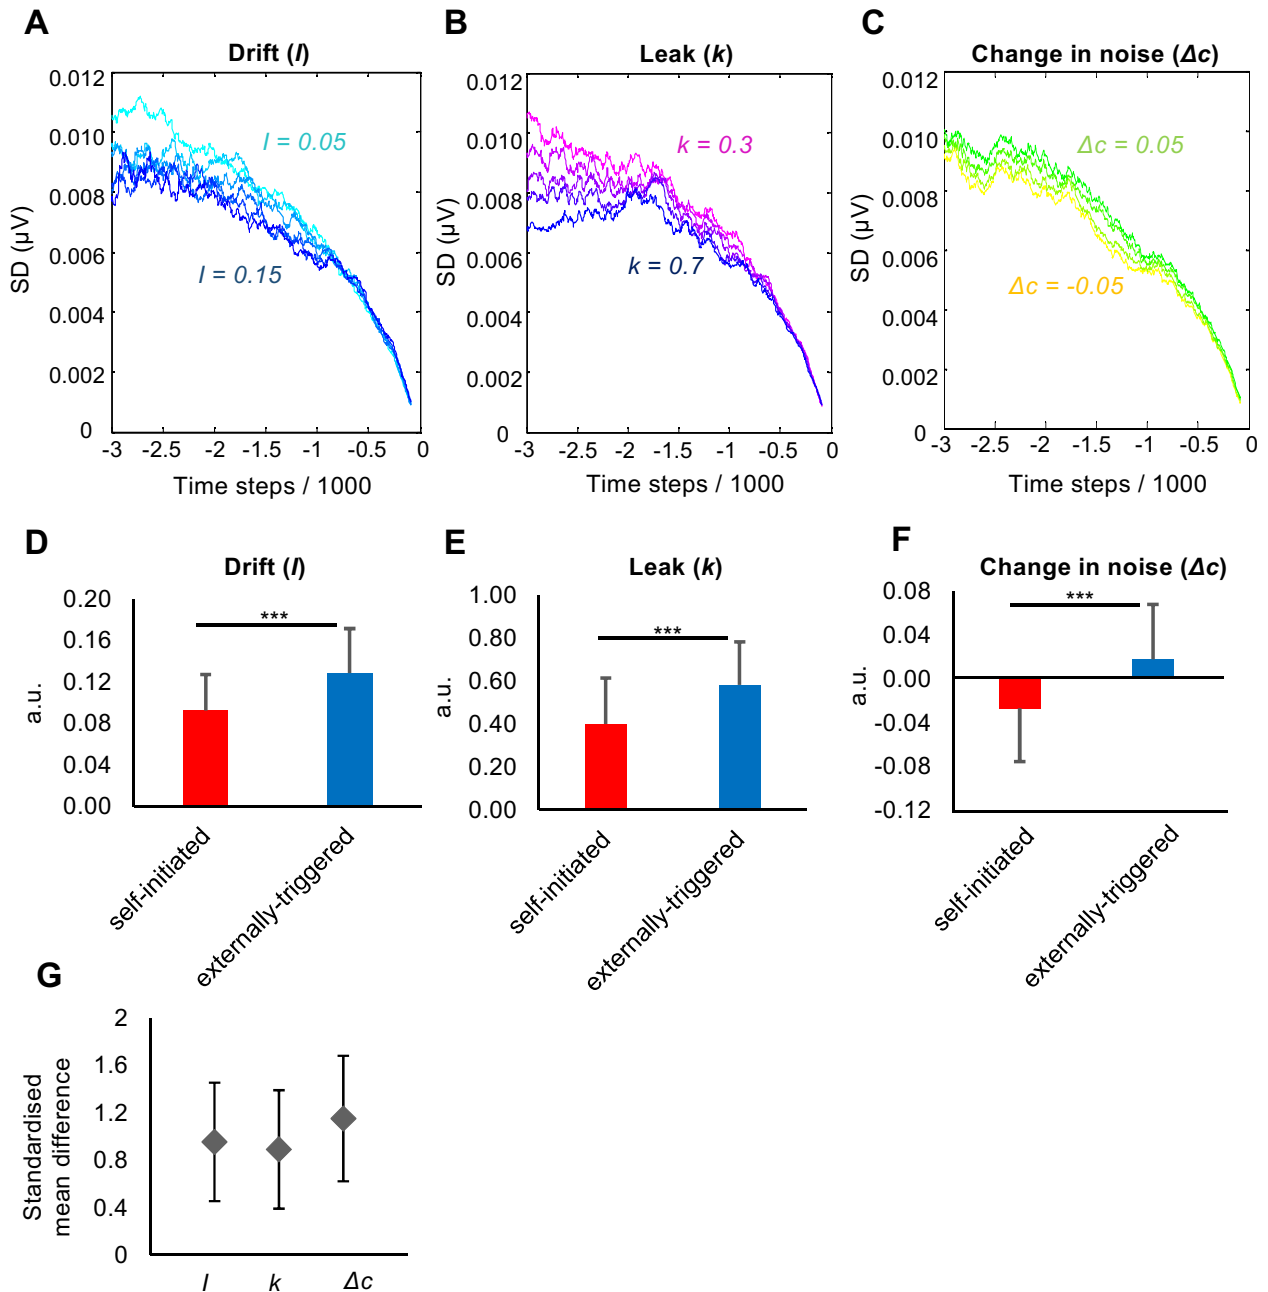

254  
 255 Figure 4 A-C. Results of sensitivity analysis. Effects of changing parameters of a stochastic  
 256 accumulator model on SD across 1000 model runs. (A) *Drift* gradually changed from 0.05 (cyan) to  
 257 0.15 (blue) in 0.02 steps, while other parameters were kept fixed. (B) *Leak* gradually changed from  
 258 0.3 (magenta) to 0.7 (blue) in 0.1 steps, while other parameters were kept fixed. (C) *Change in noise*  
 259 gradually changed from -0.05 (yellow) to 0.05 (green) in 0.02 steps, while other parameters were kept  
 260 fixed. D-F. The best fitting parameters to real mean RP amplitude in self-initiated (red) and externally-  
 261 triggered (blue) conditions. Asterisks show significant difference ( $p < 0.001$ ). Error bars show SD  
 262 across participants. G. Effect sizes ( $d_2$ ) for the between-condition difference in fitted *drift*, the *leak* and  
 263 the *change in noise* parameters. Error bars show 95% confidence interval.

264 So far, we fitted model parameters to the mean RP amplitude, and noted through separate  
265 sensitivity analysis their implications for across-trial SD. Next, we directly predicted the drop  
266 in across-trial SD of simulated RP data in self-initiated compared to externally-triggered  
267 conditions, using the optimal model parameters for each participant in each condition. We  
268 therefore simulated 22 RP data sets, using each participant's best fitting parameters in each  
269 condition (see materials and methods), and computed the SD across the simulated trials. We  
270 observed a marked additional drop in simulated across-trial SD in the self-initiated compared  
271 to externally-triggered condition (Figure 5A, B). The differential convergence between  
272 conditions in the simulated data closely tracked the differential convergence in our EEG data  
273 (Correlation across participants, Pearson's  $r = 0.90$ ,  $p < 0.001$ ) (Figure 5C).

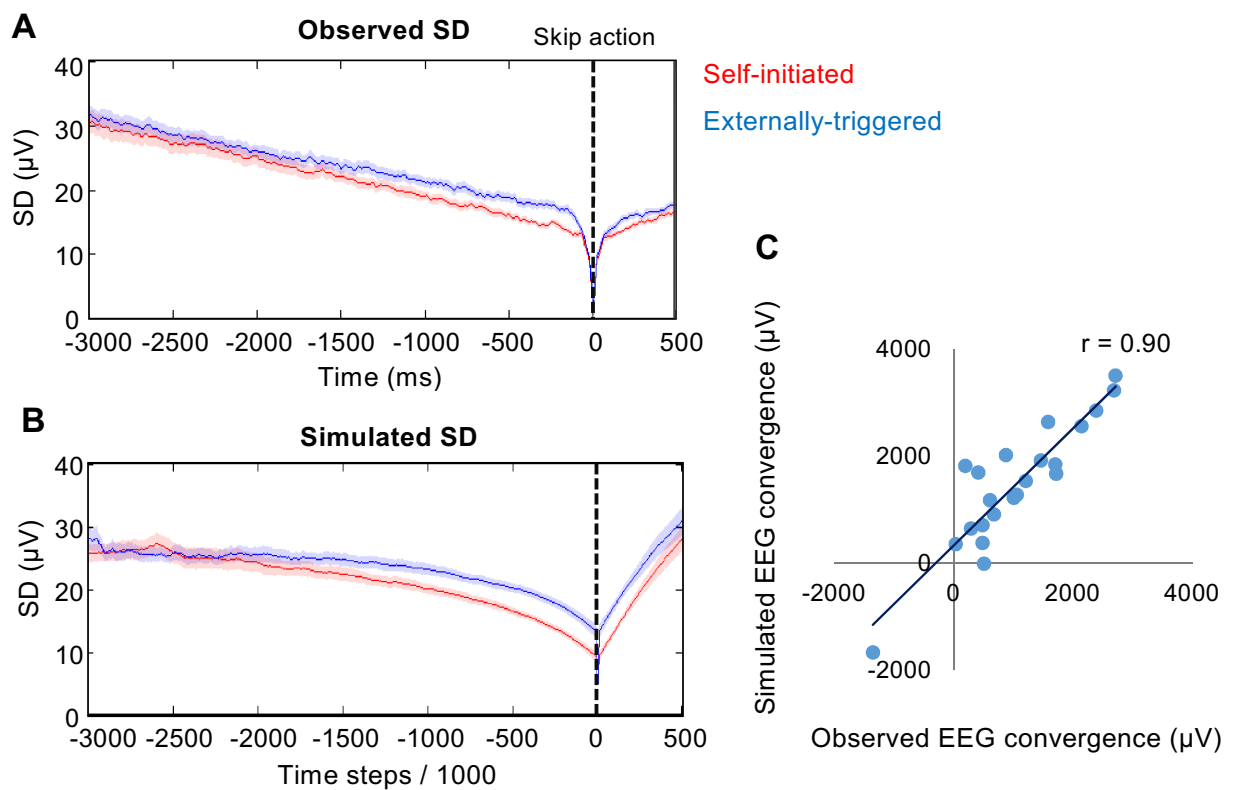

274

275 Figure 5. (A) Observed SD across trials averaged across participants  $\pm$  SEM. Data are baselined to a  
276 10 ms window around the skip and are recorded from FCz electrode. (B) Simulated SD across trials  
277 averaged across participants  $\pm$  SEM. The red and blue lines represent activity in self-initiated and  
278 externally-triggered blocks, respectively. The black vertical line is the moment of skip action. (C)  
279 Correlation between observed and simulated EEG convergence. EEG convergence was measured by  
280 subtracting the area under the SD curve in self-initiated from the externally-triggered condition.



281 *Within-trial reduction in EEG variability*

282 Optimum parameter values from the model suggest that a consistent process of noise  
283 reduction reliably occurs prior to self-initiated actions. This theory predicts that, compared to  
284 externally-triggered actions, EEG variability should reduce more strongly not only across  
285 trials but also within each single self-initiated action trial. To test this prediction we measured  
286 SD within a 100 ms sliding window for each trial, and each condition (see materials and  
287 methods) (Figure. 6A). We then used linear regression to calculate the slope of the within-  
288 trial SD change for each trial, and compared slopes between the self-initiated and externally-  
289 triggered conditions using a multilevel model with single trials as level 1 and participants as  
290 level 2 variables. While EEG variability decreased within self-initiated skip trials (mean slope  
291 =  $-0.01$   $\mu\text{V}/\text{sample}$ , SD across participants =  $0.02$   $\mu\text{V}$ ), it increased within externally-triggered  
292 trials (mean slope =  $0.01$   $\mu\text{V}/\text{sample}$ , SD across participants =  $0.02$   $\mu\text{V}$ ). The between-  
293 condition difference in slopes was highly significant ( $t(4102) = 3.39$ ,  $p < 0.001$ ; Figure. 6B),  
294 consistent with a progressive reduction of EEG variability prior to self-initiated actions.

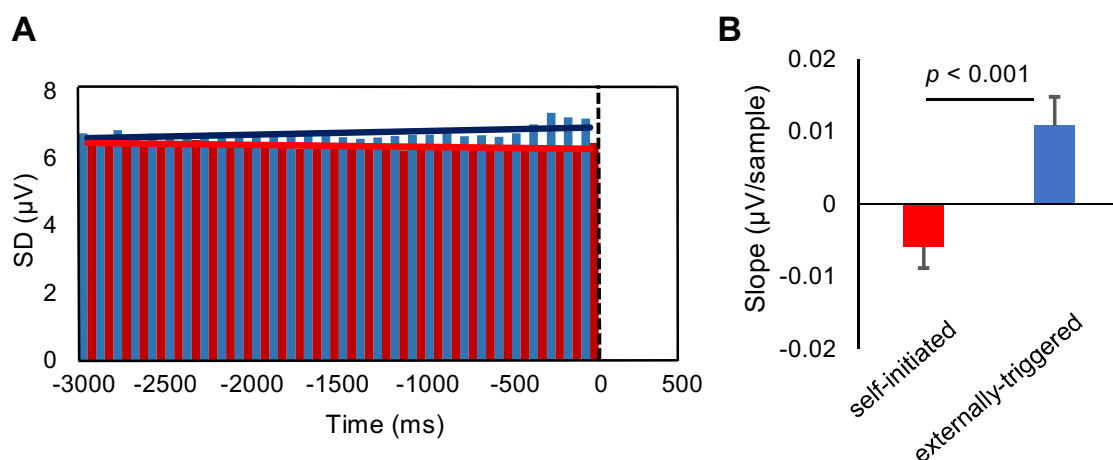

295

296 Figure 6. Within-trial EEG variability. (A) SD was measured within 100ms windows for each trial and  
297 each condition. Red and blue bars show within-trial SD in each time bin in self-initiated and externally-  
298 triggered conditions, respectively. The solid red and blue lines show the linear fit to the time bins in  
299 self-initiated and externally-triggered conditions, respectively. (B) The slope of the change in within-  
300 trial variability was then compared between the self-initiated (red) and externally-triggered (blue) skip  
301 conditions. Error bars show SEM across participants.

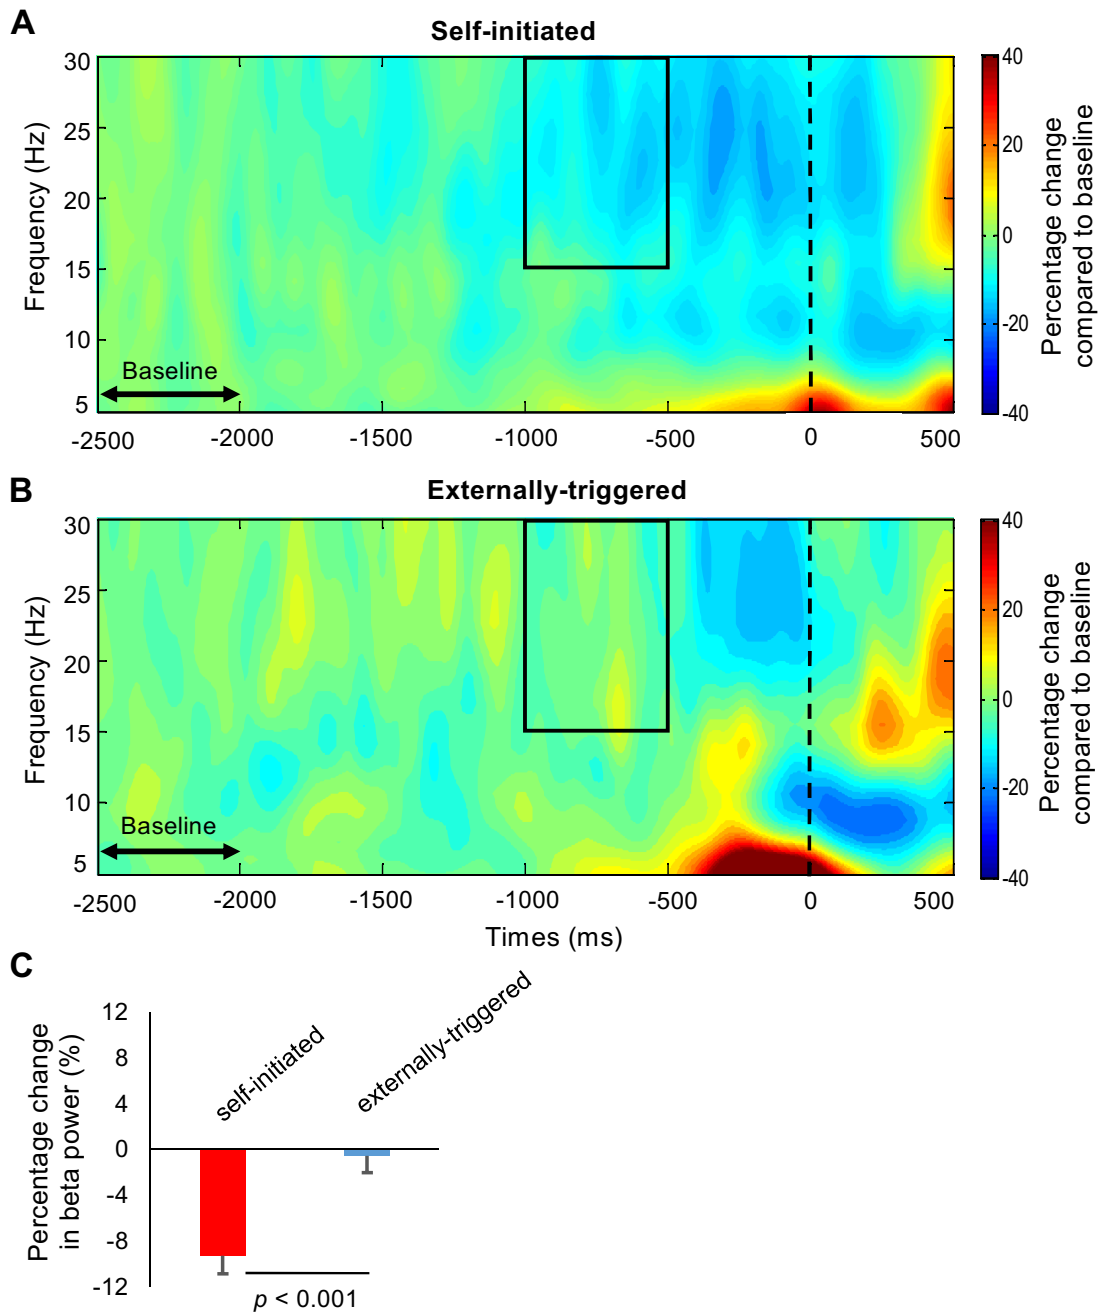

302

303 Figure 7. Percentage change in total EEG power compared to baseline (2.5 – 2 s prior to action) in  
304 self-initiated (A), and externally-triggered skip conditions (B). In each condition, the percentage  
305 change in power was computed 1 – 0.5 s prior to skip action, and from 15 – 30 Hz based on previous  
306 literature (region of interest shown by black box). (C) The percentage change from baseline was  
307 compared between the self-initiated (red bar) and externally-triggered (blue bar) conditions. Error bars  
308 show SEM across participants.

309 Previous discussions of amplitude variation in EEG focussed on synchronised activity within  
310 specific spectral bands (Pfurtscheller & Neuper, 1994). Preparatory decrease in beta-band  
311 power has been used as a reliable biomarker of voluntary action (Kristeva, Patino, & Omlor,  
312 2007). While time-series methods identify activity that is phase-locked, spectral methods  
313 identify EEG power that is both phase-locked and non-phase-locked, within each specific  
314 frequency band (Cohen, 2014; Pfurtscheller & Lopes da Silva, 1999). Since motor threshold  
315 models simply accumulate all neural activity, whether stochastic or synchronised, we  
316 reasoned that reduction in the noise scaling factor within an accumulator model might be  
317 associated with reduction in the synchronised activity. We therefore also investigated the  
318 decreasing variability of neural activity prior to self-initiated action using spectral methods  
319 (see materials and methods). Specifically, we focused on the event-related  
320 desynchronization (ERD) of beta band activity (Bai et al., 2011; Calmels et al., 2006;  
321 Stancák & Pfurtscheller, 1996). We compared ERD between the self-initiated and externally-  
322 triggered conditions in a 500 ms window (1 – 0.5 s prior to action, based on previous reports  
323 (Tzagarakis, Ince, Leuthold, & Pellizzer, 2010)). Beta power in this period decreased prior to  
324 self-initiated skip (mean percentage change = -%9.3, SD = %7.4) (Figure. 7A), but not  
325 before externally-triggered skip actions (mean percentage of change = -%0.6, SD = %6.9)  
326 (Figure. 7B). Importantly, percentage change in beta power was significantly different  
327 between the two conditions ( $t(21) = -4.16, p < 0.001$ ) (Figure 7C).

## 328 **Discussion**

329 The capacity for endogenous voluntary action lies at the heart of human nature, but the brain  
330 mechanisms that enable this capacity remain unclear. A key research bottleneck has been  
331 the lack of convincing experimental paradigms for studying volition. Many existing paradigms  
332 rely on paradoxical instructions equivalent to “be voluntary” or “act freely” (Haggard, 2005;  
333 Libet et al., 1983). In a novel paradigm, we operationalized self-initiated actions as  
334 endogenous ‘skip’ responses embedded in a perceptual decision task, with a long, random  
335 foreperiod. Participants could decide to skip waiting for an imperative stimulus, by

336 endogenously initiating a bilateral keypress. Although previous studies in animals also used  
337 '*Giving up waiting*' to study spontaneous action decisions (Murakami et al., 2014), we  
338 believe this is the first use of this approach to study self-initiated actions in humans.

339 Our experimental task provided a purely operational definition of self-initiated, endogenous  
340 skip responses. Thus, the skip action can be understood from a strict behaviourist  
341 perspective. However, skip responses have many of the hallmarks of volition traditionally  
342 used in philosophy, including internal-generation (Passingham et al., 2010), reasons-  
343 responsiveness (Anscombe, 2000), freedom from immediacy (Shadlen & Gold, 2004), and a  
344 clear counterfactual alternative (Pereboom, 2011). Crucially, operationalising self-initiated  
345 voluntary action in this way avoids explicit instructions to "act freely", and avoids subjective  
346 reports about "volition". We compared such actions to an exogenous skip response triggered  
347 by a visual cue in control blocks.

348 The neural activity that generates self-initiated voluntary actions remains controversial.  
349 Several theories attribute a key role to medial frontal regions (Kriehoff, Waszak, Prinz, &  
350 Brass, 2011; Nachev, Kennard, & Husain, 2008; Passingham, 1995). Averaged scalp EEG  
351 in humans revealed a rising negativity beginning 1 s or more before the onset of  
352 endogenous actions (Kornhuber & Deecke, 1965), and appearing to originate in medial  
353 frontal cortex (Boschert, Hink, & Deecke, 1983; Deecke & Kornhuber, 1978). Since this  
354 'readiness potential' does not occur before involuntary or externally-triggered movements, it  
355 has been interpreted as the electro-physiological sign of planning, preparation, and initiation  
356 of self-initiated actions (Keller & Heckhausen, 1990; Kornhuber & Deecke, 1990). RP-like  
357 brain activities preceding self-initiated actions were also reported at the single-neuron level  
358 (Fried, Mukamel, & Kreiman, 2011). However, the view of the RP as a causal signal for  
359 voluntary action has been challenged, because simply averaging random neural fluctuations  
360 that trigger a motor action also produces RP-like patterns (Schurger et al., 2012). Such  
361 stochastic accumulator models were subsequently used to predict humans' (Schurger et al.,  
362 2012) and rats' self-initiated actions in a task similar to ours (Murakami et al., 2014). Thus, it

363 remains highly controversial whether the RP results from a specific precursor process that  
364 prepares self-initiated actions, or from random intrinsic fluctuations. We combined an  
365 experimental design that provides a clear operational definition of volition, and an analysis of  
366 *distribution across and within individual trials* of pre-movement EEG. Our results support a  
367 novel combination of both the classical and the stochastic views. We report the novel finding  
368 that self-initiated movements are reliably preceded by a process of noise reduction. This  
369 process alters the pattern of stochastic fluctuations that accumulate towards the motor  
370 threshold.

371 EEG showed decreased trial-to-trial variability prior to skip actions. This partly reflects the  
372 time-locking and baseline-correction at the time of action: ERP methods necessarily imply  
373 zero variability at the baseline (Luck, 2005). However, around 1.5 s prior to skip actions, the  
374 decrease in variability became more marked for self-initiated compared to control externally-  
375 triggered skip actions. Since the skip action in the externally-triggered control condition has  
376 no endogenous volitional component, the decrease in variability prior to skip actions in the  
377 control condition presumably reflects only the effects of time-locking, and the temporal  
378 autocorrelation of the background EEG. However, the *additional* decrease in variability prior  
379 to self-initiated action may reflect convergence of neural activity towards a steady trajectory  
380 that precedes self-initiated actions. We hypothesised that this could indicate a consistent  
381 preparatory process leading to self-initiated voluntary action.

382 Measurement of inter-trial variability has been extensively used in the analysis of neural data  
383 (Averbeck & Lee, 2003; Churchland et al., 2011; Churchland et al., 2010, 2006; He, 2013;  
384 Saberi-Moghadam, Ferrari-Toniolo, Ferraina, Caminiti, & Battaglia-Mayer, 2016; Schurger et  
385 al., 2015). For example, presenting a target stimulus decreases inter-trial variability of neural  
386 firing rate in premotor cortex (Churchland et al., 2006). Interestingly, RTs to external stimuli  
387 are shortest when variability is lowest, suggesting that a decrease in neural variability is a  
388 marker of motor preparation (Churchland et al., 2006). Moreover, reducing neural variability  
389 is characteristic of cortical responses to any external stimulus (Churchland et al., 2010), and

390 could be a reliable signature of conscious perception (Schurger et al., 2015). Importantly, in  
391 previous studies, the decline in neural variability was *triggered* by a target stimulus, i.e.  
392 decreasing neural variability was triggered exogenously (Churchland et al., 2010). Our  
393 results show that inter-trial variability also decreases prior to a self-initiated action, in the  
394 absence of any external target.

395 Integration to bound models have been recently used to account for the neural activity  
396 preceding self-initiated actions in humans (Schurger et al., 2012) and rodents (Murakami et  
397 al., 2014). In the absence of external evidence, these models are fed solely with internal  
398 physiological noise. Importantly, when signal-to-noise ratio is low the timing of the decision  
399 to move is mainly determined by random fluctuations. Schurger et al.'s model first shifts  
400 premotor activity closer to a motor threshold. This is followed by a threshold-crossing event,  
401 triggered by stochastic fluctuations (Schurger et al., 2012). By fitting a modified version of  
402 the leaky stochastic accumulator model on each participant's mean RP amplitude, we  
403 observed that integration of internal noise evolves differently prior to self-initiated and  
404 externally-triggered skip actions. The rate of the *drift* and the *leak* was lower and the *change*  
405 *in noise* was negative prior to self-initiated actions, compared to externally-triggered actions.  
406 Importantly, analysis of across-trial variability of simulated data, using model parameters  
407 optimised for each participant, implied that the marked drop in variability that we observed  
408 prior to self-initiated action was mainly driven by a gradually reducing noise level. Previous  
409 studies show that changes in noise level influences choice, RT and confidence in  
410 accumulation-to-bound models of perceptual decision (Fetsch, Kiani, Newsome, & Shadlen,  
411 2014; Furstenberg, Breska, Sompolinsky, & Deouell, 2015; Kiani, Hanks, & Shadlen, 2008;  
412 Zylberberg, Fetsch, & Shadlen, 2016). Interestingly, the motivating effects of reward on  
413 speed and accuracy of behaviour were recently shown to be attributable to active control of  
414 internal noise (Manohar et al., 2015). In general, previous studies show an important role of  
415 active noise control in tasks requiring responses to external stimuli (Kool & Botvinick, 2013;  
416 Manohar et al., 2015). We have shown that similar processes may underlie self-initiated

417 action, and that a consistent process of noise reduction may be a key precursor of self-  
418 initiated voluntary action.

419 Finally, we showed that a decrease in premotor neural variability prior to self-initiated action  
420 is not only observed across-trials, but is also realised within-trial and as a reduction in power  
421 of beta frequency band. Clearly, any natural muscular action must have *some* precursors.  
422 Sherrington's final common path concept proposed that descending neural commands from  
423 primary motor cortex necessarily preceded voluntary action (Sherrington, 1906). However, it  
424 remains unclear *how long* before action such precursor processes can be identified. Our  
425 result provides a new method for addressing this question. The question is theoretically  
426 important, because cognitive accounts of self-initiated action control divide into two broad  
427 classes. In classical accounts, a fixed, and relatively long-lasting precursor process is  
428 caused by a prior decision to act (Anscombe, 2000; Kornhuber & Deecke, 1990). In other  
429 recent accounts, stochastic fluctuations dominate until a relatively late stage, and fixed  
430 precursor processes would be confined to brief, motoric execution processes (Schurger et  
431 al., 2012).

432 Our study cannot show whether self-initiated voluntary actions are caused by prior decisions,  
433 or by randomness. However, our results do suggest that the contribution of stochastic  
434 fluctuations is supplemented by a precursor process of noise reduction starting from around  
435 1.5 s prior to action. Importantly, and by the same token, our results cannot show whether  
436 the precursor process of noise reduction is initiated by some top-down decision, or is itself  
437 triggered by some ongoing spontaneous fluctuations. Further, the precursor processes that  
438 our method identifies may be necessary for self-initiated action, but may not be sufficient:  
439 identifying a precursor process prior to self-initiated movement says nothing about whether  
440 and how often such a process might also be present in the absence of movement. On one  
441 view, the precursor process might occur quite frequently, but a last-minute decision might  
442 influence whether the precursor process completes with a movement, or is vetoed. Our  
443 movement-locked analyses cannot identify any putative vetoed precursor processes, or

444 precursor-like processes that failed to result in a movement. However, our spectral analyses  
445 (Figure 7) make this possibility unlikely. They show a gradual decline in total beta-band  
446 power beginning around 1 s prior to self-initiated action. Any putative vetoed precursor  
447 processes would produce partial versions of this effect at other time-points in the epoch, but  
448 these are not readily apparent.

449 Inter-trial variability provides an additional dimension to information coding in the brain (He,  
450 2013; Schurger et al., 2015; Stein, Gossen, & Jones, 2005). We showed that both inter- and  
451 within-trial variability decreases prior to a self-initiated action, akin to a reliable preparatory  
452 process. Our computational modelling further suggests that this preparatory stabilising  
453 process may itself reflect some as yet unknown mechanism of noise reduction. Actively  
454 regulating noise at optimal levels typically enhances system performance (Faisal, Selen, &  
455 Wolpert, 2008; Fitts, 1954; Groen & Wenderoth, 2016; Shu, Hasenstaub, Badoual, Bal, &  
456 McCormick, 2003). However, noise regulation can also arise incidentally, as a result of  
457 attractor dynamics in the motor system, as in the “optimal subspace hypothesis” (Shenoy,  
458 Sahani, & Churchland, 2013). Further, the noise reduction mechanism in our data could itself  
459 be triggered either by a specific top-down signal or a stochastic event. Finally, we speculate  
460 that the process of noise reduction not only explains the reduction in inter- and within-trial  
461 EEG variability prior to self-initiated action, but also generates the slow rising negativity of  
462 the RP, and the well-known beta ERD that precedes voluntary actions. ERD represents an  
463 activation in cortical areas that produce motor behaviour (Pfurtscheller, 1992; Pfurtscheller &  
464 Lopes da Silva, 1999). Factors such as effort and attention enhance the ERD (Defebvre,  
465 Bourriez, Destée, & Guieu, 1996). However, the relation between ERD and RP remained  
466 unclear. Our modelling results suggest that a reliable process of noise reduction could  
467 explain both the ERD, and the RP.

468 Interestingly, our endogenous skip response resembles the decision to explore during  
469 foraging behaviour (Constantino & Daw, 2015; Kolling, Behrens, Mars, & Rushworth, 2012).  
470 That is, endogenous skip responses amounted to deciding to look out for dot-motion stimuli



471 in forthcoming time-periods, rather than the present one. This prompts the speculation that  
472 spontaneous transition from rest to foraging or vice-versa could be an early evolutionary  
473 antecedent of human volition.

474 In conclusion, we show that self-initiated actions have a reliable precursor, namely a  
475 consistent process of neural noise reduction prior to movement. We began this paper by  
476 distinguishing between a classical model, in which a fixed preparation process consistently  
477 preceded self-initiated action, and a fully stochastic model, in which the triggering of self-  
478 initiated action is essentially random – though the artefact of working with movement-locked  
479 epochs might give the appearance of a consistent precursor event such as the RP. We have  
480 identified a reliable precursor process, but this precursor process can be accommodated as  
481 a parameter change within the stochastic model framework. Future research might usefully  
482 investigate whether the precursor process is the cause or the consequence of the subjective  
483 ‘decision to act’.

## 484 **Materials and Methods**

### 485 *Participants.*

486 24 healthy volunteers, aged 18-35 years of age (9 male, mean age = 23 years), were  
487 recruited from the Institute of Cognitive Neuroscience subject data pool. Two participants  
488 were excluded before data analysis (they provided insufficient EEG data because of  
489 excessive blinking). All participants were right handed, had normal or corrected to normal  
490 vision, had no history or family history of seizure, epilepsy or any neurologic or psychiatric  
491 disorder. Participants affirmed that they had not participated in any brain stimulation  
492 experiment in the last 48 h, nor had consumed alcohol in the last 24 h. Participants were  
493 paid an institution-approved amount for participating in the experiment. Experimental design  
494 and procedure were approved by the UCL research ethics committee, and followed the  
495 principles of the Declaration of Helsinki.

496 *Behavioural task and procedure.*

497 Participants were placed in an electrically shielded chamber, 55 cm in front of a computer  
498 screen (60 Hz refresh rate). After signing the consent form, the experimental procedure was  
499 explained and the EEG cap was set up. The behavioural task was as follows: participants  
500 were instructed to look at a fixation cross in the middle of the screen. The colour of the  
501 fixation cross changed slowly and continuously throughout the trial. This colour always  
502 started from 'black' and then gradually changed to other colours in a randomised order. The  
503 fixation cross changed colour gradually (e.g., from green to pink), taking 2.57 s. The fixation  
504 cross was initially black, but the sequence of colours thereafter was random. At the same  
505 time, participants waited for a display of randomly moving dots (displayed within a circular  
506 aperture of 7° of diameter with a density of 14.28 dots/degree, initially moving with 0%  
507 coherence with a speed of 2°/s (Desantis, Waszak, & Gorea, 2016; Desantis, Waszak,  
508 Moutsopoulou, & Haggard, 2016), to move coherently (step change to 100% coherence)  
509 towards the left or right. They responded with the left or right hand by pressing a left or right  
510 arrow key on a keyboard, accordingly. The change in dot motion coherence happened  
511 abruptly. Correct responses were rewarded (2p). Conversely, participants lost money (-1p)  
512 for giving a wrong answer (responding with the left hand when dots were moving to right or  
513 vice versa), for responding before dots start moving, or not responding within 2 s after dot  
514 motion. The trial was interrupted while such error feedback was given. Importantly, the time  
515 of coherent movement onset was drawn unpredictably from an exponential distribution (min  
516 = 2 s, max = 60 s, mean = 12 s), so waiting was sometimes extremely long. However, this  
517 wait could be avoided by a 'skip' response (see later). Participants could lose time by  
518 waiting, but receive a big reward (2p) if they responded correctly, or could save time by  
519 'skipping' but collect a smaller reward (1p) (Fig. 1A). The experiment was limited to one  
520 hour, so using the skip response required a general understanding of the trade-off between  
521 time and money. Participants were carefully informed in advance of the rewards for

522 responses to dot motion, and for skip response, and were clearly informed that the  
523 experiment had a fixed duration of one hour.

524 There were two blocked conditions, which differed only in the origin of the skip response. In  
525 the '*self-initiated*' condition blocks, participants could skip waiting if they chose to, by  
526 pressing the left and right response keys simultaneously. The skip response saved time, but  
527 produced a smaller reward (1p) than a response to dot motion. Each block consisted of 10  
528 trials. To ensure consistent visual attention, participants were required to monitor the colour  
529 of the fixation cross, which cycled through an unpredictable sequence of colours. At the end  
530 of each block they were asked to classify the number of times the fixation cross turned  
531 'yellow', according to the following categories : never, less than 50%, 50%, more than 50%.  
532 They lost money (-1p) for giving a wrong answer. At the end of each block, participants  
533 received feedback of total reward values, total elapsed time, and number of skips. They  
534 could use this feedback to adjust their behaviour and maximise earnings, by regulating the  
535 number of endogenous 'skip' responses.

536 In the '*externally-triggered*' condition blocks, participants could not choose for themselves  
537 when to skip. Instead, they were instructed to make skip responses by an external signal.  
538 The external signal was an unpredictable change in the colour of the fixation cross to 'red'  
539 (Fig. 1B). Participants were instructed to make the skip response *as soon as* they detected  
540 the change. The time of the red colour appearance was yoked to the time of participant's  
541 own previous skip responses in the immediately preceding self-initiated block, in a  
542 randomised order. For participants who started with the externally-triggered block, the timing  
543 of the red colour appearance in the first block only was yoked to the time of previous  
544 participant's last self-initiated block. The colour cycle of the fixation cross had a random  
545 sequence, so that the onset of a red fixation could not be predicted. The fixation cross  
546 ramped to 'red' from its previous colour in 300 ms. Again, a small reward (1p) was given for  
547 skipping. The trial finished and the participant lost money (-1p) if s/he did not skip within 2.5  
548 s from beginning of the ramping colour of the fixation cross. The 'red' colour was left out of

549 the colour cycle in the self-initiated blocks. To control for any confounding effect of attending  
550 to the fixation cross, participants were also required to attend to the fixation cross in the self-  
551 initiated blocks and to roughly estimate the number of times the fixation cross turned 'yellow'  
552 (see previous). Each externally-triggered block had 10 trials, and after each block feedback  
553 was displayed. Each self-initiated block was interleaved with an externally-triggered block,  
554 and the order of the blocks was counterbalanced between the participants. The behavioural  
555 task was designed in Psychophysics Toolbox Version 3 (Brainard, 1997).

#### 556 *EEG recording.*

557 While participants were performing the behavioural task in a shielded chamber, EEG signals  
558 were recorded and amplified using an ActiveTwo Biosemi system (BioSemi, Amsterdam,  
559 The Netherlands). Participants wore a 64-channel EEG cap. To shorten the preparation time  
560 we recorded from a subset of electrodes that mainly covers central and visual areas: F3, Fz,  
561 F4, FC1, FCz, FC2, C3, C1, Cz, C2, C4, CP1, CPz, CP2, P3, Pz, P4, O1, Oz, O2. Bipolar  
562 channels placed on the outer canthi of each eye and below and above the right eye were  
563 used to record horizontal and vertical electro-oculogram (EOG), respectively. The Biosemi  
564 Active electrode has an output impedance of less than 1 Ohm. EEG signals were recorded  
565 at a sampling rate of 2048 Hz.

#### 566 *EEG preprocessing.*

567 EEG data preprocessing was performed in Matlab (MathWorks, MA, USA) with the help of  
568 EEGLAB toolbox (Delorme & Makeig, 2004). Data were downsampled to 250 Hz and low-  
569 pass filtered at 30 Hz. No high-pass filtering and no detrending were applied, to preserve  
570 slow fluctuations. All electrodes were referenced to the average of both mastoid electrodes.  
571 Separate data epochs of 4 s duration were extracted for self-initiated and externally-  
572 triggered skip actions. Data epochs started from 3 s before to 1 s after the action. To avoid  
573 EEG epochs overlapping each other any trial in which participants skipped earlier than 3 s

574 from trial initiation was removed. On average, 5% and 4% of trials were removed from the  
575 self-initiated and externally-triggered conditions, respectively.

576 RP recordings are conventionally baseline-corrected using a baseline 2.5 until 2 s before  
577 action. This involves the implicit assumption that RPs begin only in the 2 s before action  
578 onset (Shibasaki & Hallett, 2006), but this assumption is rarely articulated explicitly, and is in  
579 fact questionable (Verbaarschot, Farquhar, & Haselager, 2015). We instead took a baseline  
580 from -5 ms +5 ms with respect to action onset. This choice avoids making any assumption  
581 about how or when the RP starts. To ensure this choice of baseline did not capitalize on  
582 chance, we performed parallel analyses on demeaned data (effectively taking the entire  
583 epoch as baseline), with consistent results (see Figure. S2). Finally, to reject non-ocular  
584 artefacts, data epochs from EEG channels (not including EOG) with values exceeding a  
585 threshold of  $\pm 150 \mu\text{v}$  were removed. On average 7% and 8% of trials were rejected from  
586 self-initiated and externally-triggered conditions, respectively. In the next step, Independent  
587 Component Analysis (ICA) was used to remove ocular artefacts from the data. Ocular ICA  
588 components were identified by visual inspection. Trials with artefacts remaining after this  
589 procedure were excluded by visual inspection.

590 *EEG analysis.*

591 Preliminary inspection showed a typical RP-shaped negative-going slow component that  
592 was generally maximal at FCz. Therefore, data from FCz was chosen for subsequent  
593 analysis. Time series analysis was performed in Matlab (MathWorks) with the help of the  
594 FieldTrip toolbox (Oostenveld et al., 2010). We measured two dependent variables as  
595 precursors of both *self-initiated* and *externally-triggered* skip actions: mean RP amplitude  
596 across trials and variability of RP amplitudes across and within trials (measured by SD). To  
597 compare across-trials SD between the two conditions, data epochs were divided into four  
598 500 ms windows, starting 2 s before action onset: [-2, -1.5 s], [-1.5, -1 s], [-1, -0.5 s], [-0.5, 0  
599 s]. All p-values were Bonferroni corrected for four comparisons. To get a precise estimate of

600 the standard error of the difference between conditions, paired-samples t-tests were  
601 performed on jack-knifed data (Efron & Stein, 1981; Kiesel, Miller, Jolicoeur, & Brisson,  
602 2008). Unlike the traditional methods, this technique compares variation of interest across  
603 subsets of the total sample rather than across individuals, by temporarily leaving each  
604 subject out of the calculation. In addition, we also performed cluster-based permutation tests  
605 on SD (Maris & Oostenveld, 2007). These involve a priori identification of a set of electrodes  
606 and a time-window of interest, and incorporate appropriate corrections for multiple  
607 comparisons. Importantly, they avoid further arbitrary assumptions associated with selecting  
608 specific sub-elements of the data of interest, such as individual electrodes, time-bins or ERP  
609 components. The cluster-based tests were performed using the following parameters: time  
610 interval = [-2 - 0 s relative to action], minimum number of neighbouring electrodes required =  
611 2, number of draws from the permutation distribution = 1000.

612 To measure variability of RP amplitudes within each individual trial, the SD of the EEG signal  
613 from FCz was measured across time in a 100 ms window. This window was applied  
614 successively in 30 time bins from the beginning of the epoch (3 s prior to action) to the time  
615 of action onset. We used linear regression to calculate the slope of the within-trial SD as a  
616 function of time (Figure. 6A). This was performed separately for each trial and each  
617 participant. Slopes greater than 0 indicate that EEG within the 100 ms window becomes  
618 more variable with the approach to action onset. Finally, we compared slopes of this within-  
619 trial SD measure between self-initiated and externally-triggered conditions in a multilevel  
620 model with single trials as level 1 and participants as level 2 variables. Multilevel analysis  
621 was performed in R (R Core Team, Vienna, Austria).

622 Time-frequency analysis was performed with custom written Matlab scripts. The  
623 preprocessed EEG time series were decomposed into their time-frequency representation by  
624 using Complex Morlet wavelet with 20 frequencies, ranging linearly from 5 to 30 Hz. The  
625 number of wavelet cycles increased from 3 to 7 in the same number of steps used to  
626 increase the frequency of the wavelets from 5 to 30 Hz. Power at each trial, each frequency

627 and each time point was measured by convolving the raw time series with the wavelet and  
628 squaring the resulting complex number. The power at each frequency and each time point  
629 was then averaged across trials for each participant. Edge artefacts were removed by  
630 discarding the first and last 500 ms of the epoch. Baseline time window was defined as the  
631 first 500 ms of the epoch (after removal of edge artefacts: 2.5 - 2 s prior to skip action).  
632 Changes in power during action preparation was subsequently expressed as the percentage  
633 of change relative to the average power during the baseline time window, across time at a  
634 specific frequency. Baseline normalisation was performed by using the following equation:

$$percentage_{tf} = 100 \frac{power_{tf} - \overline{baseline}_f}{\overline{baseline}_f}$$

635  
636 Values > 0 indicates that power at a specific frequency ( $f$ ) and a specific time ( $t$ ) is higher  
637 relative to the average power at the same frequency during the first 500 ms of the epoch.  
638 Finally, we asked whether percentage change in power relative to baseline differs between  
639 self-initiated and externally-triggered skip conditions in the beta band (15 – 30 Hz). Beta  
640 band Event-related Desynchronization (ERD) during action preparation is a well-established  
641 phenomenon (Bai, Mari, Vorbach, & Hallett, 2005; Doyle, Yarrow, & Brown, 2005;  
642 Pfurtscheller & Lopes da Silva, 1999). Beta power was calculated in a 500 ms window  
643 starting from 1 s and ending 0.5 s prior to skip action. We avoided analysing later windows  
644 (e.g., 0.5 - 0 s prior to action) to avoid possible contamination from action execution following  
645 presentation of the red fixation cross that cued externally-triggered responses. The average  
646 normalised power across all pixels within the selected window was then calculated for each  
647 participant and compared across conditions using paired-samples t-tests.

648 *Modelling and simulations.*

649 All simulations were done in Matlab (MathWorks). We used a modified version of the Leaky  
650 Stochastic Accumulator Model (Usher & McClelland, 2001), in which the activity of  
651 accumulators increases stochastically over time but is limited by leakage.

$$\delta x = (I - kx)\Delta t + c\xi\sqrt{\Delta t}$$

652 Where  $I$  is drift rate,  $k$  is leak (exponential decay in  $x$ ),  $\xi$  is Gaussian noise,  $c$  is noise scaling  
653 factor, and  $\Delta t$  is the discrete time step (we used  $\Delta t = 0.001$ ). This leaky stochastic  
654 accumulator has been used previously to model the neural decision of ‘when’ to move in a  
655 self-initiated task (Schurger et al., 2012). In that experiment,  $I$  was defined as the general  
656 imperative to respond (with a constant rate). This imperative, if appropriately small in  
657 magnitude, moves the baseline level of activity closer to the threshold, but not over it. Thus,  
658 imperative alone does not trigger action, but does increase the likelihood of a random  
659 threshold-crossing event triggering action. In the original model,  $c$  was assumed to be  
660 constant and was fixed at 0.1. In a departure from the original model, we assumed that the  
661 noise scaling factor could change linearly from an initial value of  $c_1$  to a final value of  $c_2$ ,  
662 during action preparation. Consequently,  $\Delta c$  was defined as the magnitude of change in the  
663 noise scaling factor during the trial.

$$\Delta c = c_2 - c_1$$

664 A negative  $\Delta c$  means that signal becomes less noisy as it approaches the threshold for  
665 action. Therefore, the modified model in our experiment had five free parameters:  $I$ ,  $k$ ,  $c_1$ ,  $c_2$   
666 and threshold.

$$\delta x = (I - kx)\Delta t + c_t\xi\sqrt{\Delta t}$$

667 Where  $c_t$  is noise scaling factor at time  $t$ . The threshold was expressed as a percentile of the  
668 output amplitude over a set of 1000 simulated trials (each of 50,000 time steps each).  
669 Epochs of simulated data were matched to epochs of actual EEG data by identifying the  
670 point of first threshold crossing event within each simulated trial and then extracting an  
671 epoch from 3000 time steps before to 1000 time steps after the threshold crossing.



672 Parameter estimation for self-initiated skip action was performed by fitting the model against  
673 the *real mean* RP amplitude of each participant in self-initiated condition. First, 1000 unique  
674 trials of Gaussian noise, each 50,000 time steps, were generated for each participant and  
675 were fed into the model. The initial values of the model's parameters were derived from  
676 previous studies (Schurger et al., 2012). The output of the model was then averaged across  
677 trials and was down sampled to 250 Hz to match the sampling rate of the real EEG data. A  
678 *least squares* approach was used to minimise root mean squared deviation (RMSD)  
679 between the *simulated* and *real* mean RP, by adjusting the free parameters of the model for  
680 each participant (by using the MATLAB 'fminsearch' function). Note that this procedure  
681 optimised the model parameters to reproduce the mean RP, rather than individual trials.

682 To fit the model to our externally-triggered skip condition, we fixed the threshold of each  
683 participant at their best fitting threshold from the self-initiated condition. We wanted to keep  
684 the threshold the same in both conditions so that we could test the effect of changing noise  
685 levels for a given threshold. Importantly, we also fixed the value of  $c_1$  at its optimal value  
686 from the self-initiated condition. By using this strategy, we can ask how noisiness of the  
687 signal *changes*, from its initial value, and we can compare this change in noise between  
688 conditions. We additionally performed parallel simulations without the assumption of a  
689 common initial noise level, and obtained essentially similar results. Specifically  $\Delta c$  in the all-  
690 parameter-free model (mean= 0.02, SD = 0.06) was similar to the  $\Delta c$  in the model with  $c_1$   
691 and threshold fixed (mean= 0.02, SD = 0.05). The remaining parameters ( $l$ ,  $k$ ,  $c_2$ ) were  
692 optimised by minimising the deviation between the *simulated mean* RP and the *real mean*  
693 RP in externally-triggered condition.

694 Finally, we tested the model on the across-trial variability of RP epochs, having *fitted* the  
695 model parameters to the mean RP. All parameters of the model were fixed at each  
696 participant's optimised values for the self-initiated condition, and for the externally-triggered  
697 condition respectively. The model was run 44 times (22 participants, x 2 conditions) with the  
698 appropriate parameters, and 1000 separate trials were generated, each corresponding to a

699 putative RP exemplar. The Gaussian noise element of the model ensured that these 1000  
700 exemplars were non-identical. The standard deviation across trials was calculated from  
701 these 1000 simulated RP exemplars, for each participant and each condition. Importantly,  
702 this procedure fits the model to each participant's *mean* RP amplitude, but then tests the fit  
703 on the *standard deviation* across the 1000 simulated trials. Finally, to assess similarity  
704 between the real and predicted SD reduction, the predicted SD in self-initiated and  
705 externally-triggered conditions was plotted as a function of time and the area between the  
706 two curves was computed. We then compared the area between the SD curves in a 2 s  
707 interval prior to self-initiated and externally-triggered conditions for all participants' simulated  
708 data, and actual data (Figure 5), using Pearson's correlation.

### 709 **Author Contributions**

710 Conceptualization, N.K., P.H., A.S., and A.D.; Methodology, N.K. and A.S.; Software, N.K.  
711 and A.D.; Formal Analysis, N.K., L.Z., and P.H.; Investigation, N.K., L.Z.; Writing-original  
712 draft, N.K., Writing-review & editing, P.H., A.S., Supervision, P.H. and A.S.

### 713 **Acknowledgement**

714 This work was supported by the European Research Council Advanced Grant HUMVOL  
715 (Grant number: 323943). This work was additionally supported by a grant from  
716 The Leverhulme Trust (Ref. RPG-2016-378) to PH. AS was supported by a starting grant  
717 from the European Research Council (Grant number 640626). The authors declare no  
718 competing financial interest.

## References

- Anscombe, G. E. M. (2000). *Intention*. Harvard University Press.
- Averbeck, B. B., & Lee, D. (2003). Neural noise and movement-related codes in the macaque supplementary motor area. *The Journal of Neuroscience: The Official Journal of the Society for Neuroscience*, *23*(20), 7630–7641.
- Bai, O., Mari, Z., Vorbach, S., & Hallett, M. (2005). Asymmetric spatiotemporal patterns of event-related desynchronization preceding voluntary sequential finger movements: a high-resolution EEG study. *Clinical Neurophysiology: Official Journal of the International Federation of Clinical Neurophysiology*, *116*(5), 1213–1221. <https://doi.org/10.1016/j.clinph.2005.01.006>
- Bai, O., Rathi, V., Lin, P., Huang, D., Battapady, H., Fei, D.-Y., ... Hallett, M. (2011). Prediction of human voluntary movement before it occurs. *Clinical Neurophysiology: Official Journal of the International Federation of Clinical Neurophysiology*, *122*(2), 364–372. <https://doi.org/10.1016/j.clinph.2010.07.010>
- Boschert, J., Hink, R. F., & Deecke, L. (1983). Finger movement versus toe movement-related potentials: further evidence for supplementary motor area (SMA) participation prior to voluntary action. *Experimental Brain Research*, *52*(1), 73–80.
- Brainard, D. H. (1997). The Psychophysics Toolbox. *Spatial Vision*, *10*(4), 433–436.
- Calmels, C., Holmes, P., Jarry, G., Lévèque, J.-M., Hars, M., & Stam, C. J. (2006). Cortical activity prior to, and during, observation and execution of sequential finger movements. *Brain Topography*, *19*(1–2), 77–88. <https://doi.org/10.1007/s10548-006-0014-x>
- Casini, L., & Vidal, F. (2011). The SMAs: neural substrate of the temporal accumulator? *Frontiers in Integrative Neuroscience*, *35*. <https://doi.org/10.3389/fnint.2011.00035>
- Churchland, A. K., Kiani, R., Chaudhuri, R., Wang, X.-J., Pouget, A., & Shadlen, M. N. (2011). Variance as a signature of neural computations during decision making. *Neuron*, *69*(4), 818–831. <https://doi.org/10.1016/j.neuron.2010.12.037>
- Churchland, M. M., Yu, B. M., Cunningham, J. P., Sugrue, L. P., Cohen, M. R., Corrado, G. S., ... Shenoy, K. V. (2010). Stimulus onset quenches neural variability: a widespread cortical phenomenon. *Nature Neuroscience*, *13*(3), 369–378. <https://doi.org/10.1038/nn.2501>
- Churchland, M. M., Yu, B. M., Ryu, S. I., Santhanam, G., & Shenoy, K. V. (2006). Neural Variability in Premotor Cortex Provides a Signature of Motor Preparation. *The Journal of Neuroscience*, *26*(14), 3697–3712. <https://doi.org/10.1523/JNEUROSCI.3762-05.2006>

- Cohen, M. X. (2014). *Analyzing Neural Time Series Data: Theory and Practice* (1 edition). Cambridge, Massachusetts: MIT Press.
- Constantino, S. M., & Daw, N. D. (2015). Learning the opportunity cost of time in a patch-foraging task. *Cognitive, Affective & Behavioral Neuroscience*, *15*(4), 837–853. <https://doi.org/10.3758/s13415-015-0350-y>
- Cunnington, R., Windischberger, C., Deecke, L., & Moser, E. (2002). The preparation and execution of self-initiated and externally-triggered movement: a study of event-related fMRI. *NeuroImage*, *15*(2), 373–385. <https://doi.org/10.1006/nimg.2001.0976>
- Deecke, L., & Kornhuber, H. H. (1978). An electrical sign of participation of the mesial “supplementary” motor cortex in human voluntary finger movement. *Brain Research*, *159*(2), 473–476.
- Defebvre, L., Bourriez, J. L., Destée, A., & Guieu, J. D. (1996). Movement related desynchronisation pattern preceding voluntary movement in untreated Parkinson’s disease. *Journal of Neurology, Neurosurgery & Psychiatry*, *60*(3), 307–312. <https://doi.org/10.1136/jnnp.60.3.307>
- Delorme, A., & Makeig, S. (2004). EEGLAB: an open source toolbox for analysis of single-trial EEG dynamics including independent component analysis. *Journal of Neuroscience Methods*, *134*(1), 9–21. <https://doi.org/10.1016/j.jneumeth.2003.10.009>
- Dennett, D. C. (2015). *Elbow Room: The Varieties of Free Will Worth Wanting* (New edition). Cambridge, Massachusetts ; London, England: MIT Press.
- Desantis, A., Waszak, F., & Gorea, A. (2016). Agency alters perceptual decisions about action-outcomes. *Experimental Brain Research*. <https://doi.org/10.1007/s00221-016-4684-7>
- Desantis, A., Waszak, F., Moutsopoulou, K., & Haggard, P. (2016). How action structures time: About the perceived temporal order of action and predicted outcomes. *Cognition*, *146*, 100–109. <https://doi.org/10.1016/j.cognition.2015.08.011>
- Dirnberger, G., Lang, W., & Lindinger, G. (2008). A new method to determine temporal variability in the period of pre-movement electroencephalographic activity. *International Journal of Psychophysiology: Official Journal of the International Organization of Psychophysiology*, *70*(3), 165–170. <https://doi.org/10.1016/j.ijpsycho.2008.08.006>
- Doyle, L. M. F., Yarrow, K., & Brown, P. (2005). Lateralization of event-related beta desynchronization in the EEG during pre-cued reaction time tasks. *Clinical Neurophysiology: Official Journal of the International Federation of Clinical Neurophysiology*, *116*(8), 1879–1888. <https://doi.org/10.1016/j.clinph.2005.03.017>
- Efron, B., & Stein, C. (1981). The Jackknife Estimate of Variance. *The Annals of Statistics*, *9*(3), 586–596.

- Faisal, A. A., Selen, L. P. J., & Wolpert, D. M. (2008). Noise in the nervous system. *Nature Reviews Neuroscience*, 9(4), 292–303. <https://doi.org/10.1038/nrn2258>
- Fetsch, C. R., Kiani, R., Newsome, W. T., & Shadlen, M. N. (2014). Effects of Cortical Microstimulation on Confidence in a Perceptual Decision. *Neuron*, 83(4), 797–804. <https://doi.org/10.1016/j.neuron.2014.07.011>
- Fitts, P. M. (1954). The information capacity of the human motor system in controlling the amplitude of movement. *Journal of Experimental Psychology*, 47(6), 381–391. <https://doi.org/10.1037/h0055392>
- Fried, I., Mukamel, R., & Kreiman, G. (2011). Internally generated preactivation of single neurons in human medial frontal cortex predicts volition. *Neuron*, 69(3), 548–562. <https://doi.org/10.1016/j.neuron.2010.11.045>
- Furstenberg, A., Breska, A., Sompolinsky, H., & Deouell, L. Y. (2015). Evidence of Change of Intention in Picking Situations. *Journal of Cognitive Neuroscience*, 1–14. [https://doi.org/10.1162/jocn\\_a\\_00842](https://doi.org/10.1162/jocn_a_00842)
- Gold, J. I., & Shadlen, M. N. (2007). The Neural Basis of Decision Making. *Annual Review of Neuroscience*, 30(1), 535–574. <https://doi.org/10.1146/annurev.neuro.29.051605.113038>
- Groen, O. van der, & Wenderoth, N. (2016). Transcranial Random Noise Stimulation of Visual Cortex: Stochastic Resonance Enhances Central Mechanisms of Perception. *Journal of Neuroscience*, 36(19), 5289–5298. <https://doi.org/10.1523/JNEUROSCI.4519-15.2016>
- Haggard, P. (2005). Conscious intention and motor cognition. *Trends in Cognitive Sciences*, 9(6), 290–295. <https://doi.org/10.1016/j.tics.2005.04.012>
- Haggard, P. (2008). Human volition: towards a neuroscience of will. *Nature Reviews Neuroscience*, 9(12), 934–946. <https://doi.org/10.1038/nrn2497>
- He, B. J. (2013). Spontaneous and task-evoked brain activity negatively interact. *The Journal of Neuroscience: The Official Journal of the Society for Neuroscience*, 33(11), 4672–4682. <https://doi.org/10.1523/JNEUROSCI.2922-12.2013>
- Jahanshahi, M., Jenkins, I. H., Brown, R. G., Marsden, C. D., Passingham, R. E., & Brooks, D. J. (1995). Self-initiated versus externally triggered movements. I. An investigation using measurement of regional cerebral blood flow with PET and movement-related potentials in normal and Parkinson's disease subjects. *Brain: A Journal of Neurology*, 118 ( Pt 4), 913–933.
- Keller, I., & Heckhausen, H. (1990). Readiness potentials preceding spontaneous motor acts: voluntary vs. involuntary control. *Electroencephalography and Clinical Neurophysiology*, 76(4), 351–361.

- Kiani, R., Hanks, T. D., & Shadlen, M. N. (2008). Bounded Integration in Parietal Cortex Underlies Decisions Even When Viewing Duration Is Dictated by the Environment. *Journal of Neuroscience*, 28(12), 3017–3029.  
<https://doi.org/10.1523/JNEUROSCI.4761-07.2008>
- Kiesel, A., Miller, J., Jolicoeur, P., & Brisson, B. (2008). Measurement of ERP latency differences: a comparison of single-participant and jackknife-based scoring methods. *Psychophysiology*, 45(2), 250–274. <https://doi.org/10.1111/j.1469-8986.2007.00618.x>
- Kolling, N., Behrens, T. E. J., Mars, R. B., & Rushworth, M. F. S. (2012). Neural mechanisms of foraging. *Science (New York, N.Y.)*, 336(6077), 95–98.  
<https://doi.org/10.1126/science.1216930>
- Kool, W., & Botvinick, M. (2013). The intrinsic cost of cognitive control. *The Behavioral and Brain Sciences*, 36(6), 697-698-726. <https://doi.org/10.1017/S0140525X1300109X>
- Kornhuber, H. H., & Deecke, L. (1965). Hirnpotentialänderungen bei Willkürbewegungen und passiven Bewegungen des Menschen: Bereitschaftspotential und reafferente Potentiale. *Pflüger's Archiv für die gesamte Physiologie des Menschen und der Tiere*, 284(1), 1–17. <https://doi.org/10.1007/BF00412364>
- Kornhuber, H. H., & Deecke, L. (1990). Readiness for movement - The Bereitschaftspotential story. Citation Classic Commentary. *Current Contents Life Sciences*, 33(4).
- Kriehoff, V., Waszak, F., Prinz, W., & Brass, M. (2011). Neural and behavioral correlates of intentional actions. *Neuropsychologia*, 49(5), 767–776.  
<https://doi.org/10.1016/j.neuropsychologia.2011.01.025>
- Kristeva, R., Patino, L., & Omlor, W. (2007). Beta-range cortical motor spectral power and corticomuscular coherence as a mechanism for effective corticospinal interaction during steady-state motor output. *NeuroImage*, 36(3), 785–792.  
<https://doi.org/10.1016/j.neuroimage.2007.03.025>
- Libet, B., Gleason, C. A., Wright, E. W., & Pearl, D. K. (1983). Time of conscious intention to act in relation to onset of cerebral activity (readiness-potential). The unconscious initiation of a freely voluntary act. *Brain: A Journal of Neurology*, 106 (Pt 3), 623–642.
- Luck, S. J. (2005). *An Introduction to the Event-Related Potential Technique*. Cambridge, Mass: MIT Press.
- Manohar, S. G., Chong, T. T.-J., Apps, M. A. J., Batla, A., Stamelou, M., Jarman, P. R., ... Husain, M. (2015). Reward Pays the Cost of Noise Reduction in Motor and Cognitive Control. *Current Biology: CB*, 25(13), 1707–1716.  
<https://doi.org/10.1016/j.cub.2015.05.038>

- Maris, E., & Oostenveld, R. (2007). Nonparametric statistical testing of EEG- and MEG-data. *Journal of Neuroscience Methods*, 164(1), 177–190.  
<https://doi.org/10.1016/j.jneumeth.2007.03.024>
- Murakami, M., Vicente, M. I., Costa, G. M., & Mainen, Z. F. (2014). Neural antecedents of self-initiated actions in secondary motor cortex. *Nature Neuroscience*.  
<https://doi.org/10.1038/nn.3826>
- Nachev, P., & Hacker, P. (2014). The neural antecedents to voluntary action: a conceptual analysis. *Cognitive Neuroscience*, 5(3–4), 193–208.  
<https://doi.org/10.1080/17588928.2014.934215>
- Nachev, P., Kennard, C., & Husain, M. (2008). Functional role of the supplementary and pre-supplementary motor areas. *Nature Reviews Neuroscience*, 9(11), 856–869.  
<https://doi.org/10.1038/nrn2478>
- Oostenveld, R., Fries, P., Maris, E., Schoffelen, J.-M., Oostenveld, R., Fries, P., ... Schoffelen, J.-M. (2010). FieldTrip: Open Source Software for Advanced Analysis of MEG, EEG, and Invasive Electrophysiological Data. *Computational Intelligence and Neuroscience*, 2011, e156869. <https://doi.org/10.1155/2011/156869>
- Papa, S. M., Artieda, J., & Obeso, J. A. (1991). Cortical activity preceding self-initiated and externally triggered voluntary movement. *Movement Disorders: Official Journal of the Movement Disorder Society*, 6(3), 217–224. <https://doi.org/10.1002/mds.870060305>
- Passingham, R. (1995). *The Frontal Lobes and Voluntary Action*. Oxford University Press.
- Passingham, R. E., Bengtsson, S. L., & Lau, H. C. (2010). Medial frontal cortex: from self-generated action to reflection on one's own performance. *Trends in Cognitive Sciences*, 14(1), 16–21. <https://doi.org/10.1016/j.tics.2009.11.001>
- Pereboom, D. (2011). Free Will Skepticism and Meaning in Life. In R. Kane (Ed.), *The Oxford Handbook of Free Will*. Oxford University Press.
- Pfurtscheller, G. (1992). Event-related synchronization (ERS): an electrophysiological correlate of cortical areas at rest. *Electroencephalography and Clinical Neurophysiology*, 83(1), 62–69.
- Pfurtscheller, G., & Lopes da Silva, F. H. (1999). Event-related EEG/MEG synchronization and desynchronization: basic principles. *Clinical Neurophysiology: Official Journal of the International Federation of Clinical Neurophysiology*, 110(11), 1842–1857.
- Pfurtscheller, G., & Neuper, C. (1994). Event-related synchronization of mu rhythm in the EEG over the cortical hand area in man. *Neuroscience Letters*, 174(1), 93–96.
- Saberi-Moghadam, S., Ferrari-Toniolo, S., Ferraina, S., Caminiti, R., & Battaglia-Mayer, A. (2016). Modulation of Neural Variability in Premotor, Motor, and Posterior Parietal Cortex during Change of Motor Intention. *The Journal of Neuroscience: The Official*

- Journal of the Society for Neuroscience*, 36(16), 4614–4623.  
<https://doi.org/10.1523/JNEUROSCI.3300-15.2016>
- Schurger, A., Sarigiannidis, I., Naccache, L., Sitt, J. D., & Dehaene, S. (2015). Cortical activity is more stable when sensory stimuli are consciously perceived. *Proceedings of the National Academy of Sciences of the United States of America*, 112(16), E2083-2092. <https://doi.org/10.1073/pnas.1418730112>
- Schurger, A., Sitt, J. D., & Dehaene, S. (2012). An accumulator model for spontaneous neural activity prior to self-initiated movement. *Proceedings of the National Academy of Sciences*, 109(42), E2904–E2913. <https://doi.org/10.1073/pnas.1210467109>
- Schüür, F., & Haggard, P. (2011). What are self-generated actions? *Consciousness and Cognition*, 20(4), 1697–1704. <https://doi.org/10.1016/j.concog.2011.09.006>
- Shadlen, M. N., & Gold, J. I. (2004). In M. S. Gazzaniga (Ed.), *The Cognitive Neurosciences* (3rd edn, pp. 1229–1241). MIT Press.
- Shenoy, K. V., Sahani, M., & Churchland, M. M. (2013). Cortical control of arm movements: a dynamical systems perspective. *Annual Review of Neuroscience*, 36, 337–359. <https://doi.org/10.1146/annurev-neuro-062111-150509>
- Sherrington, C. S. (1906). *The integrative action of the nervous system*. New York, C Scribner's sons. Retrieved from <http://archive.org/details/integrativeacti02shergoog>
- Shibasaki, H., & Hallett, M. (2006). What is the Bereitschaftspotential? *Clinical Neurophysiology: Official Journal of the International Federation of Clinical Neurophysiology*, 117(11), 2341–2356. <https://doi.org/10.1016/j.clinph.2006.04.025>
- Shu, Y., Hasenstaub, A., Badoual, M., Bal, T., & McCormick, D. A. (2003). Barrages of synaptic activity control the gain and sensitivity of cortical neurons. *The Journal of Neuroscience: The Official Journal of the Society for Neuroscience*, 23(32), 10388–10401.
- Sinnott-Armstrong, W., & Nadel, L. (Eds.). (2010). *Conscious Will and Responsibility: A Tribute to Benjamin Libet* (1 edition). Oxford ; New York: OUP USA.
- Stancák, A., & Pfurtscheller, G. (1996). Event-related desynchronisation of central beta-rhythms during brisk and slow self-paced finger movements of dominant and nondominant hand. *Brain Research. Cognitive Brain Research*, 4(3), 171–183.
- Stein, R. B., Gossen, E. R., & Jones, K. E. (2005). Neuronal variability: noise or part of the signal? *Nature Reviews Neuroscience*, 6(5), 389–397. <https://doi.org/10.1038/nrn1668>
- Tzagarakis, C., Ince, N. F., Leuthold, A. C., & Pellizzer, G. (2010). Beta-band activity during motor planning reflects response uncertainty. *The Journal of Neuroscience: The Official Journal of the Society for Neuroscience*, 30(34), 11270–11277. <https://doi.org/10.1523/JNEUROSCI.6026-09.2010>



- Usher, M., & McClelland, J. L. (2001). The time course of perceptual choice: the leaky, competing accumulator model. *Psychological Review*, *108*(3), 550–592.
- Van Rijn, H., Kononowicz, T. W., Meck, W. H., Ng, K. K., & Penney, T. B. (2011). Contingent negative variation and its relation to time estimation: a theoretical evaluation. *Frontiers in Integrative Neuroscience*, *5*, 91. <https://doi.org/10.3389/fnint.2011.00091>
- Verbaarschot, C., Farquhar, J., & Haselager, P. (2015). Lost in time...: The search for intentions and Readiness Potentials. *Consciousness and Cognition*, *33C*, 300–315. <https://doi.org/10.1016/j.concog.2015.01.011>
- Walter, W. G., Cooper, R., Aldridge, V. J., McCALLUM, W. C., & Winter, A. L. (1964). Contingent Negative Variation : An Electric Sign of Sensori-Motor Association and Expectancy in the Human Brain. *Nature*, *203*(4943), 380–384. <https://doi.org/10.1038/203380a0>
- Wiese, H., Stude, P., Nebel, K., de Greiff, A., Forsting, M., Diener, H. C., & Keidel, M. (2004). Movement preparation in self-initiated versus externally triggered movements: an event-related fMRI-study. *Neuroscience Letters*, *371*(2–3), 220–225. <https://doi.org/10.1016/j.neulet.2004.08.078>
- Zylberberg, A., Fetsch, C. R., & Shadlen, M. N. (2016). The influence of evidence volatility on choice, reaction time and confidence in a perceptual decision. *eLife*, *5*. <https://doi.org/10.7554/eLife.17688>

## Supplementary Figures & Tables

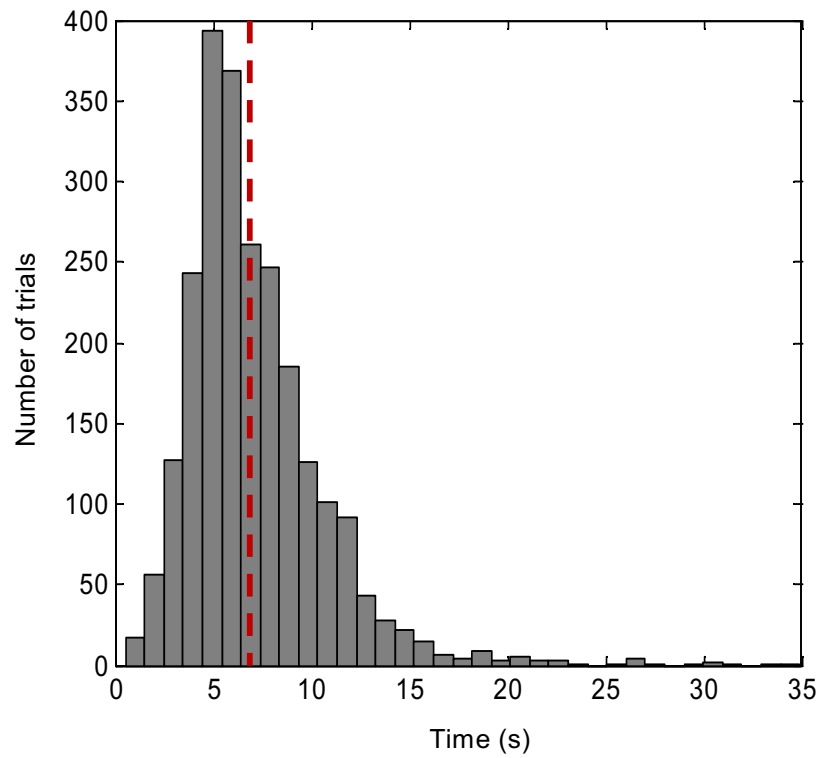

Figure S1. Histogram of waiting times before skip actions in self-initiated condition, across all trials and all participants. The dashed red line shows the average waiting time.

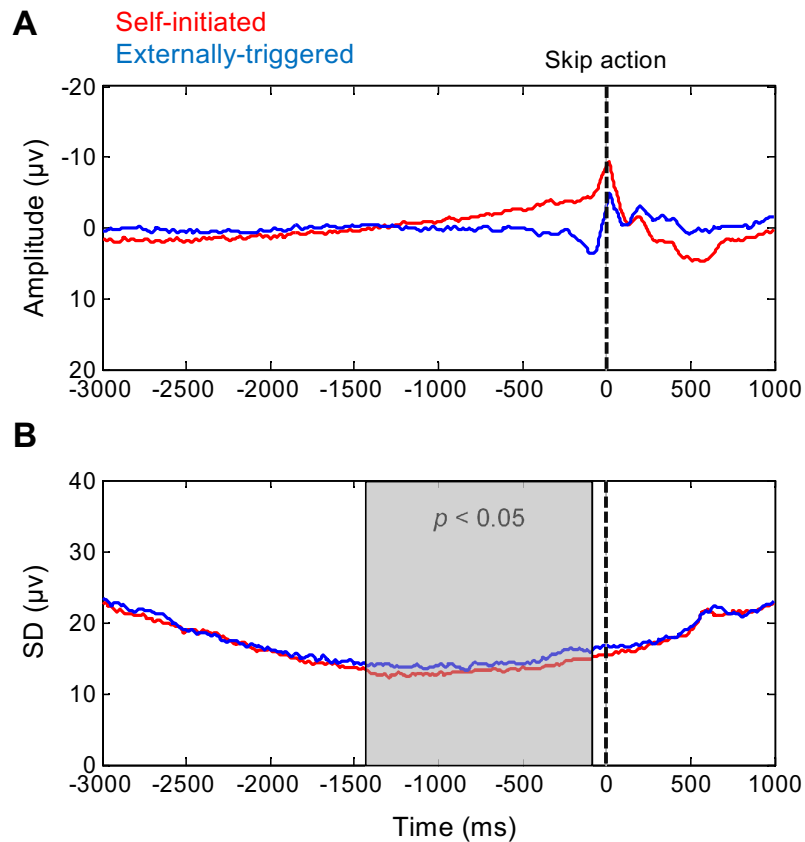

Figure S2. Demeaned EEG activity prior to skip actions. The red and blue lines represent self-initiated and externally-triggered skips, respectively. Data is time-locked to the skip action (black vertical line), and is baselined to the mean of entire epoch (i.e., demeaned), and recorded from FCz electrode. A. Grand average RP amplitude. B. Standard deviation across trials averaged across participants. Shaded area show significant clusters across central electrodes, detected by cluster-based permutation test. Whereas baselining to a limited time window forces a low SD within the baseline time window, and a progressive rise in SD with temporal distance before or after the baseline, the use of a broad baseline time window, as here, reduces this artefactual effect of baseline-correction on variability of time-locked data. Nevertheless, the difference in SD between conditions remains significant.

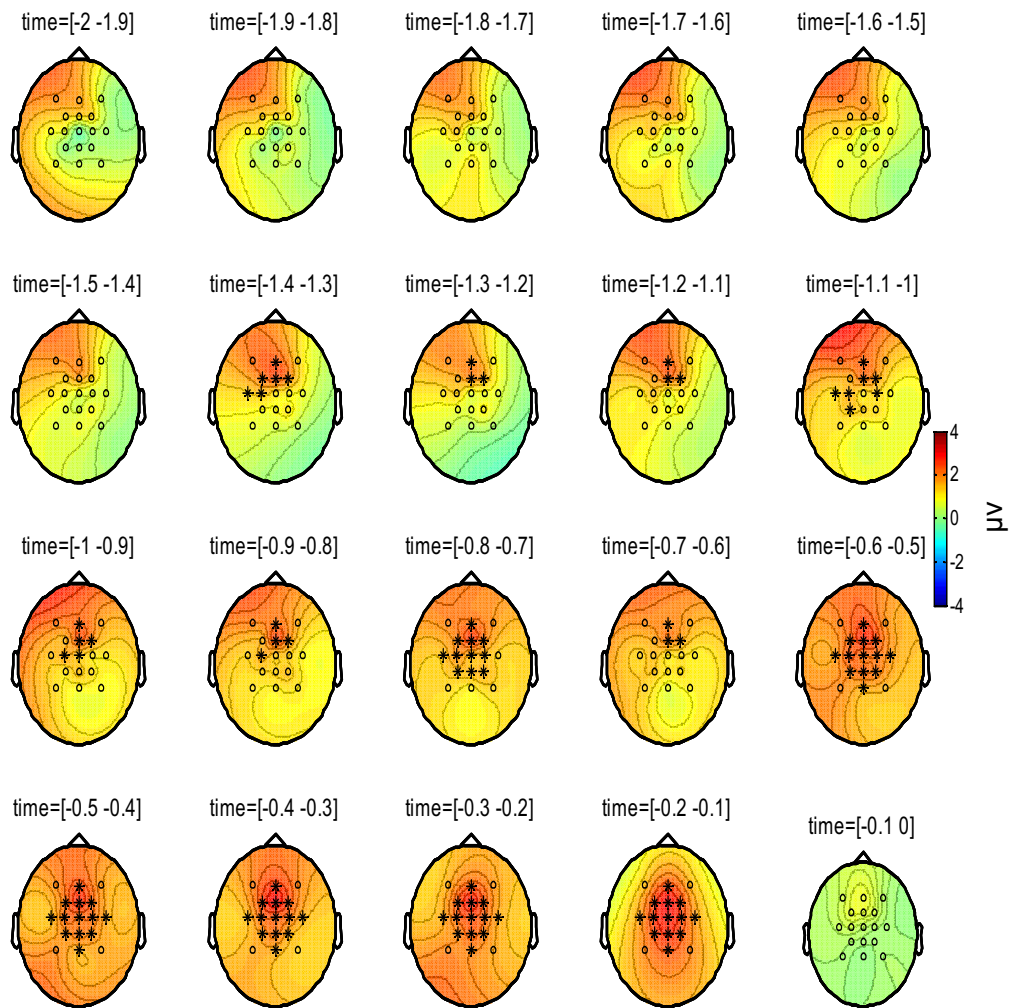

Figure S3. Topography of the difference in SDs between self-initiated and externally-triggered conditions. Small circles represent EEG electrodes across which the permutation test was performed. Electrodes that showed significant difference between conditions have been marked \*. The time interval (s) is indicated above each subplot.

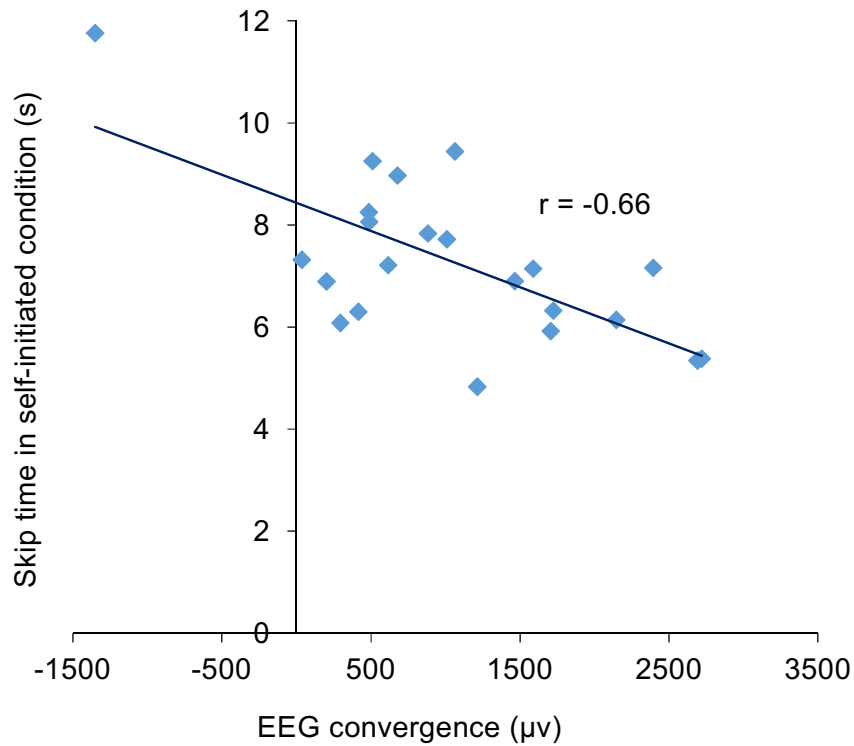

Figure S4. Correlation between participants' mean waiting time (s) before skipping in the self-initiated condition and EEG convergence. EEG convergence was measured by subtracting the area under the SD curve in self-initiated from the externally-triggered condition. There was a significant negative correlation between waiting time and EEG convergence (Pearson's  $r = -0.66$ ,  $p < 0.01$ ).

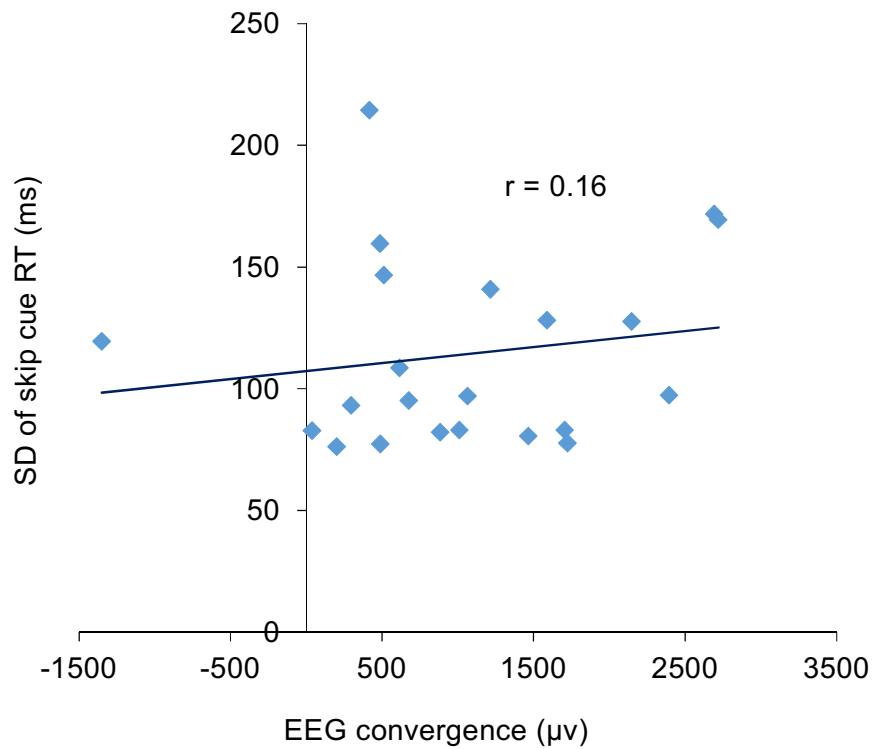

Fig S5. No significant correlation (Pearson's  $r = 0.16$ ,  $p = 0.46$ ) across participants between standard deviation of each participant's RT to externally-triggered skip cues (ms), and EEG convergence. EEG convergence was measured by subtracting the area under the SD curve in self-initiated from the externally-triggered condition.

| Subject | Mean wait (s):<br>self-initiated | Mean wait (s):<br>externally-triggered | SD<br>self-initiated | SD<br>externally-triggered |
|---------|----------------------------------|----------------------------------------|----------------------|----------------------------|
| 1       | 11.76                            | 12.09                                  | 6.82                 | 6.79                       |
| 2       | 5.38                             | 5.76                                   | 2.27                 | 2.30                       |
| 3       | 6.14                             | 6.45                                   | 4.58                 | 4.61                       |
| 4       | 7.16                             | 7.45                                   | 3.25                 | 3.22                       |
| 5       | 8.25                             | 8.39                                   | 4.57                 | 3.97                       |
| 6       | 7.21                             | 7.70                                   | 3.22                 | 3.27                       |
| 7       | 5.92                             | 6.20                                   | 1.66                 | 1.67                       |
| 8       | 7.83                             | 8.16                                   | 3.20                 | 3.23                       |
| 9       | 6.08                             | 6.48                                   | 1.26                 | 1.20                       |
| 10      | 6.32                             | 6.54                                   | 2.96                 | 2.68                       |
| 11      | 5.34                             | 5.85                                   | 1.00                 | 1.01                       |
| 12      | 6.89                             | 7.28                                   | 2.72                 | 2.70                       |
| 13      | 4.83                             | 5.23                                   | 1.83                 | 1.82                       |
| 14      | 8.06                             | 8.23                                   | 2.66                 | 2.54                       |
| 15      | 8.97                             | 9.44                                   | 3.60                 | 3.60                       |
| 16      | 9.25                             | 9.66                                   | 5.85                 | 5.91                       |
| 17      | 6.30                             | 6.81                                   | 2.69                 | 2.61                       |
| 18      | 7.72                             | 8.14                                   | 2.53                 | 2.57                       |
| 19      | 6.90                             | 7.16                                   | 2.94                 | 2.93                       |
| 20      | 7.32                             | 7.80                                   | 2.40                 | 2.62                       |
| 21      | 9.44                             | 9.85                                   | 2.93                 | 2.94                       |
| 22      | 7.14                             | 7.73                                   | 4.74                 | 5.19                       |

Table S1. Mean and standard deviation of waiting time before skipping in self-initiated and externally-triggered conditions.

| Drift ( $J$ ) | Leak ( $k$ ) | Initial noise ( $c_1$ ) | Final noise ( $c_2$ ) | Threshold | Change in noise ( $\Delta c$ ) |
|---------------|--------------|-------------------------|-----------------------|-----------|--------------------------------|
| 0.04          | -0.18        | 0.08                    | 0.01                  | 0.10      | -0.07                          |
| 0.11          | 0.55         | 0.12                    | 0.13                  | 0.14      | 0.00                           |
| 0.11          | 0.57         | 0.13                    | 0.11                  | 0.18      | -0.02                          |
| 0.11          | 0.52         | 0.12                    | 0.12                  | 0.17      | 0.00                           |
| 0.09          | 0.23         | 0.19                    | 0.14                  | 0.41      | -0.05                          |
| 0.01          | 0.38         | 0.23                    | 0.13                  | 0.42      | -0.10                          |
| 0.10          | 0.50         | 0.14                    | 0.13                  | 0.20      | -0.01                          |
| 0.12          | 0.62         | 0.10                    | 0.14                  | 0.08      | 0.04                           |
| 0.11          | 0.57         | 0.11                    | 0.13                  | 0.11      | 0.01                           |
| 0.02          | 0.27         | 0.25                    | 0.12                  | 0.44      | -0.13                          |
| 0.08          | 0.14         | 0.21                    | 0.13                  | 0.38      | -0.08                          |
| 0.11          | 0.53         | 0.12                    | 0.12                  | 0.13      | 0.01                           |
| 0.09          | 0.11         | 0.21                    | 0.12                  | 0.35      | -0.09                          |
| 0.06          | 0.17         | 0.21                    | 0.12                  | 0.39      | -0.09                          |
| 0.07          | 0.28         | 0.19                    | 0.14                  | 0.36      | -0.05                          |
| 0.11          | 0.53         | 0.12                    | 0.11                  | 0.12      | -0.01                          |
| 0.11          | 0.54         | 0.12                    | 0.12                  | 0.13      | 0.01                           |
| 0.08          | 0.22         | 0.18                    | 0.12                  | 0.29      | -0.06                          |
| 0.11          | 0.60         | 0.12                    | 0.13                  | 0.09      | 0.01                           |
| 0.11          | 0.53         | 0.12                    | 0.12                  | 0.13      | 0.01                           |
| 0.17          | 0.59         | 0.18                    | 0.24                  | 0.74      | 0.06                           |
| 0.11          | 0.55         | 0.13                    | 0.12                  | 0.15      | 0.00                           |

Table S2. Optimum parameters for self-initiated skip action. The values were detected by fitting the model against the mean RP amplitude of each participant in self-initiated condition.  $\Delta c$  was measured by subtracting the initial noise level ( $c_1$ ) from the final noise level ( $c_2$ ).



| Drift ( $l$ ) | Leak ( $k$ ) | Initial noise ( $c_1$ ) | Final noise ( $c_2$ ) | Threshold | Change in noise ( $\Delta c$ ) |
|---------------|--------------|-------------------------|-----------------------|-----------|--------------------------------|
| 0.09          | 0.42         | 0.08                    | 0.10                  | 0.10      | 0.02                           |
| 0.11          | 1.01         | 0.12                    | 0.21                  | 0.14      | 0.09                           |
| 0.10          | 0.35         | 0.13                    | 0.13                  | 0.18      | 0.00                           |
| 0.16          | 0.70         | 0.12                    | 0.16                  | 0.17      | 0.04                           |
| 0.12          | 0.48         | 0.19                    | 0.18                  | 0.41      | -0.01                          |
| 0.10          | 0.48         | 0.23                    | 0.17                  | 0.42      | -0.05                          |
| 0.09          | 0.26         | 0.14                    | 0.07                  | 0.20      | -0.06                          |
| 0.17          | 0.93         | 0.10                    | 0.24                  | 0.08      | 0.13                           |
| 0.18          | 0.44         | 0.11                    | 0.19                  | 0.11      | 0.08                           |
| 0.05          | 0.44         | 0.25                    | 0.22                  | 0.44      | -0.03                          |
| 0.10          | 0.38         | 0.21                    | 0.17                  | 0.38      | -0.04                          |
| 0.19          | 0.72         | 0.12                    | 0.15                  | 0.13      | 0.03                           |
| 0.10          | 0.41         | 0.21                    | 0.18                  | 0.35      | -0.03                          |
| 0.08          | 0.54         | 0.21                    | 0.17                  | 0.39      | -0.04                          |
| 0.12          | 0.51         | 0.19                    | 0.23                  | 0.36      | 0.05                           |
| 0.16          | 0.87         | 0.12                    | 0.15                  | 0.12      | 0.04                           |
| 0.18          | 0.69         | 0.12                    | 0.16                  | 0.13      | 0.04                           |
| 0.10          | 0.45         | 0.18                    | 0.15                  | 0.29      | -0.03                          |
| 0.21          | 0.75         | 0.12                    | 0.17                  | 0.09      | 0.05                           |
| 0.17          | 0.77         | 0.12                    | 0.20                  | 0.13      | 0.09                           |
| 0.10          | 0.61         | 0.18                    | 0.20                  | 0.74      | 0.01                           |
| 0.16          | 0.58         | 0.13                    | 0.16                  | 0.15      | 0.03                           |

Table S3. Optimum parameters for externally-triggered skip action. The values were detected by fitting the model against the mean RP amplitude of each participant in externally-triggered condition.  $\Delta c$  was measured by subtracting the initial noise level ( $c_1$ ) from the final noise level ( $c_2$ ).  $c_1$  and the threshold were fixed at their optimum values in self-initiated condition (see materials and methods for more details)
